# Supplementary material for: Integrative single-cell and spatial transcriptomics uncover ELK4-mediated mechanisms in NDUFAB1+ tumor cells driving gastric cancer progression, metabolic reprogramming, and immune evasion
Source: Frontiers journal article supplement (doi:10.3389/fimmu.2025.1591123), 2025-07-04
Supplement: Table_1.xlsx [file Table_1.xlsx]

## Sheet: Sheet1
!Series_sample_id	GSM5573466 GSM5573467 GSM5573468 GSM5573469 GSM5573470 GSM5573471 GSM5573472 GSM5573473 GSM5573474 GSM5573475 GSM5573476 GSM5573477 GSM5573478 GSM5573479 GSM5573480 GSM5573481 GSM5573482 GSM5573483 GSM5573484 GSM5573485 GSM5573486 GSM5573487 GSM5573488 GSM5573489 GSM5573490 GSM5573491 GSM5573492 GSM5573493 GSM5573494 GSM5573495 GSM5573496 GSM5573497 GSM5573498 GSM5573499 GSM5573500 GSM5573501 GSM…
!Series_contact_name	Kie Kyon,,Huang
!Series_contact_email	kiekyon.huang@gmail.com
!Series_contact_institute	Duke-NUS Graduate Medical School
!Series_contact_address	8 College Road
!Series_contact_city	Singapore
!Series_contact_state	Select State/Province
!Series_contact_zip/postal_code	169857
!Series_contact_country	Singapore
!Series_supplementary_file	ftp://ftp.ncbi.nlm.nih.gov/geo/series/GSE183nnn/GSE183904/suppl/GSE183904_RAW.tar
!Series_platform_id	GPL24676
!Series_platform_taxid	9606
!Series_sample_taxid	9606
!Series_relation	BioProject: https://www.ncbi.nlm.nih.gov/bioproject/PRJNA762312
!Sample_title	sample1: Primary Gastric Tissue (Normal)	sample2: Primary Gastric Tissue (Tumor)	sample3: Primary Gastric Tissue (Tumor)	sample4: Primary Gastric Tissue (Normal)	sample5: Primary Gastric Tissue (Tumor)	sample6: Primary Gastric Tissue (Normal)	sample7: Primary Gastric Tissue (Tumor)	sample8: Primary Gastric Tissue (Tumor)	sample9: Primary Gastric Tissue (Normal)	sample10: Primary Gastric Tissue (Tumor)	sample11: Primary Gastric Tissue (Normal)	sample12: Primary Gastric Tissue (Tumor)	sample13: Primary Gastric Tissue (Tumor)	sample14: Primary Gastric Tissue (Tumor)	sample15: Primary Gastric Tissue (Tumor)	sample16: Primary Gastric Tissue (Tumor)	sample17: Primary Gastric Tissue (Tumor)	sample18: Primary Gastric Tissue (Tumor)	sample19: Peritonium tissue (Tumor)	sample20: Peritonium tissue (Tumor)	sample21: Primary Gastric Tissue (Normal)	sample22: Primary Gastric Tissue (Tumor)	sample23: Primary Gastric Tissue (Normal)	sample24: Primary Gastric Tissue (Tumor)	sample25: Primary Gastric Tissue (Normal)	sample26: Primary Gastric Tissue (Tumor)	sample27: Primary Gastric Tissue (Tumor)	sample28: Primary Gastric Tissue (Tumor)	sample29: Primary Gastric Tissue (Tumor)	sample30: Primary Gastric Tissue (Tumor)	sample31: Primary Gastric Tissue (Normal)	sample32: Primary Gastric Tissue (Tumor)	sample33: Primary Gastric Tissue (Tumor)	sample34: Primary Gastric Tissue (Tumor)	sample35: Primary Gastric Tissue (Normal)	sample36: Primary Gastric Tissue (Tumor)	sample37: Peritonium tissue (Normal)	sample38: Peritonium tissue (Tumor)	sample39: Primary Gastric Tissue (Tumor)	sample40: Primary Gastric Tissue (Tumor)
!Sample_geo_accession	GSM5573466	GSM5573467	GSM5573468	GSM5573469	GSM5573470	GSM5573471	GSM5573472	GSM5573473	GSM5573474	GSM5573475	GSM5573476	GSM5573477	GSM5573478	GSM5573479	GSM5573480	GSM5573481	GSM5573482	GSM5573483	GSM5573484	GSM5573485	GSM5573486	GSM5573487	GSM5573488	GSM5573489	GSM5573490	GSM5573491	GSM5573492	GSM5573493	GSM5573494	GSM5573495	GSM5573496	GSM5573497	GSM5573498	GSM5573499	GSM5573500	GSM5573501	GSM5573502	GSM5573503	GSM5573504	GSM5573505
!Sample_status	Public on Oct 05 2021	Public on Oct 05 2021	Public on Oct 05 2021	Public on Oct 05 2021	Public on Oct 05 2021	Public on Oct 05 2021	Public on Oct 05 2021	Public on Oct 05 2021	Public on Oct 05 2021	Public on Oct 05 2021	Public on Oct 05 2021	Public on Oct 05 2021	Public on Oct 05 2021	Public on Oct 05 2021	Public on Oct 05 2021	Public on Oct 05 2021	Public on Oct 05 2021	Public on Oct 05 2021	Public on Oct 05 2021	Public on Oct 05 2021	Public on Oct 05 2021	Public on Oct 05 2021	Public on Oct 05 2021	Public on Oct 05 2021	Public on Oct 05 2021	Public on Oct 05 2021	Public on Oct 05 2021	Public on Oct 05 2021	Public on Oct 05 2021	Public on Oct 05 2021	Public on Oct 05 2021	Public on Oct 05 2021	Public on Oct 05 2021	Public on Oct 05 2021	Public on Oct 05 2021	Public on Oct 05 2021	Public on Oct 05 2021	Public on Oct 05 2021	Public on Oct 05 2021	Public on Oct 05 2021
!Sample_submission_date	Sep 10 2021	Sep 10 2021	Sep 10 2021	Sep 10 2021	Sep 10 2021	Sep 10 2021	Sep 10 2021	Sep 10 2021	Sep 10 2021	Sep 10 2021	Sep 10 2021	Sep 10 2021	Sep 10 2021	Sep 10 2021	Sep 10 2021	Sep 10 2021	Sep 10 2021	Sep 10 2021	Sep 10 2021	Sep 10 2021	Sep 10 2021	Sep 10 2021	Sep 10 2021	Sep 10 2021	Sep 10 2021	Sep 10 2021	Sep 10 2021	Sep 10 2021	Sep 10 2021	Sep 10 2021	Sep 10 2021	Sep 10 2021	Sep 10 2021	Sep 10 2021	Sep 10 2021	Sep 10 2021	Sep 10 2021	Sep 10 2021	Sep 10 2021	Sep 10 2021
!Sample_last_update_date	Oct 07 2021	Oct 07 2021	Oct 07 2021	Oct 07 2021	Oct 07 2021	Oct 07 2021	Oct 07 2021	Oct 07 2021	Oct 07 2021	Oct 07 2021	Oct 07 2021	Oct 07 2021	Oct 07 2021	Oct 07 2021	Oct 07 2021	Oct 07 2021	Oct 07 2021	Oct 07 2021	Oct 07 2021	Oct 07 2021	Oct 07 2021	Oct 07 2021	Oct 07 2021	Oct 07 2021	Oct 07 2021	Oct 07 2021	Oct 07 2021	Oct 07 2021	Oct 07 2021	Oct 07 2021	Oct 07 2021	Oct 07 2021	Oct 07 2021	Oct 07 2021	Oct 07 2021	Oct 07 2021	Oct 07 2021	Oct 07 2021	Oct 07 2021	Oct 07 2021
!Sample_type	SRA	SRA	SRA	SRA	SRA	SRA	SRA	SRA	SRA	SRA	SRA	SRA	SRA	SRA	SRA	SRA	SRA	SRA	SRA	SRA	SRA	SRA	SRA	SRA	SRA	SRA	SRA	SRA	SRA	SRA	SRA	SRA	SRA	SRA	SRA	SRA	SRA	SRA	SRA	SRA
!Sample_channel_count	1	1	1	1	1	1	1	1	1	1	1	1	1	1	1	1	1	1	1	1	1	1	1	1	1	1	1	1	1	1	1	1	1	1	1	1	1	1	1	1
!Sample_source_name_ch1	Stomach	Stomach	Stomach	Stomach	Stomach	Stomach	Stomach	Stomach	Stomach	Stomach	Stomach	Stomach	Stomach	Stomach	Stomach	Stomach	Stomach	Stomach	peritoneum	peritoneum	Stomach	Stomach	Stomach	Stomach	Stomach	Stomach	Stomach	Stomach	Stomach	Stomach	Stomach	Stomach	Stomach	Stomach	Stomach	Stomach	peritoneum	peritoneum	Stomach	Stomach
!Sample_organism_ch1	Homo sapiens	Homo sapiens	Homo sapiens	Homo sapiens	Homo sapiens	Homo sapiens	Homo sapiens	Homo sapiens	Homo sapiens	Homo sapiens	Homo sapiens	Homo sapiens	Homo sapiens	Homo sapiens	Homo sapiens	Homo sapiens	Homo sapiens	Homo sapiens	Homo sapiens	Homo sapiens	Homo sapiens	Homo sapiens	Homo sapiens	Homo sapiens	Homo sapiens	Homo sapiens	Homo sapiens	Homo sapiens	Homo sapiens	Homo sapiens	Homo sapiens	Homo sapiens	Homo sapiens	Homo sapiens	Homo sapiens	Homo sapiens	Homo sapiens	Homo sapiens	Homo sapiens	Homo sapiens
!Sample_characteristics_ch1	tissue: Primary Gastric Tissue (Normal)	tissue: Primary Gastric Tissue (Tumor)	tissue: Primary Gastric Tissue (Tumor)	tissue: Primary Gastric Tissue (Normal)	tissue: Primary Gastric Tissue (Tumor)	tissue: Primary Gastric Tissue (Normal)	tissue: Primary Gastric Tissue (Tumor)	tissue: Primary Gastric Tissue (Tumor)	tissue: Primary Gastric Tissue (Normal)	tissue: Primary Gastric Tissue (Tumor)	tissue: Primary Gastric Tissue (Normal)	tissue: Primary Gastric Tissue (Tumor)	tissue: Primary Gastric Tissue (Tumor)	tissue: Primary Gastric Tissue (Tumor)	tissue: Primary Gastric Tissue (Tumor)	tissue: Primary Gastric Tissue (Tumor)	tissue: Primary Gastric Tissue (Tumor)	tissue: Primary Gastric Tissue (Tumor)	tissue: Peritonium tissue (Tumor)	tissue: Peritonium tissue (Tumor)	tissue: Primary Gastric Tissue (Normal)	tissue: Primary Gastric Tissue (Tumor)	tissue: Primary Gastric Tissue (Normal)	tissue: Primary Gastric Tissue (Tumor)	tissue: Primary Gastric Tissue (Normal)	tissue: Primary Gastric Tissue (Tumor)	tissue: Primary Gastric Tissue (Tumor)	tissue: Primary Gastric Tissue (Tumor)	tissue: Primary Gastric Tissue (Tumor)	tissue: Primary Gastric Tissue (Tumor)	tissue: Primary Gastric Tissue (Normal)	tissue: Primary Gastric Tissue (Tumor)	tissue: Primary Gastric Tissue (Tumor)	tissue: Primary Gastric Tissue (Tumor)	tissue: Primary Gastric Tissue (Normal)	tissue: Primary Gastric Tissue (Tumor)	tissue: Peritonium tissue (Normal)	tissue: Peritonium tissue (Tumor)	tissue: Primary Gastric Tissue (Tumor)	tissue: Primary Gastric Tissue (Tumor)
!Sample_molecule_ch1	polyA RNA	polyA RNA	polyA RNA	polyA RNA	polyA RNA	polyA RNA	polyA RNA	polyA RNA	polyA RNA	polyA RNA	polyA RNA	polyA RNA	polyA RNA	polyA RNA	polyA RNA	polyA RNA	polyA RNA	polyA RNA	polyA RNA	polyA RNA	polyA RNA	polyA RNA	polyA RNA	polyA RNA	polyA RNA	polyA RNA	polyA RNA	polyA RNA	polyA RNA	polyA RNA	polyA RNA	polyA RNA	polyA RNA	polyA RNA	polyA RNA	polyA RNA	polyA RNA	polyA RNA	polyA RNA	polyA RNA
!Sample_extract_protocol_ch1	Single cell were dissociated from gastric tissue sample using tumor dissociation kit from Miltenyi Biotec	Single cell were dissociated from gastric tissue sample using tumor dissociation kit from Miltenyi Biotec	Single cell were dissociated from gastric tissue sample using tumor dissociation kit from Miltenyi Biotec	Single cell were dissociated from gastric tissue sample using tumor dissociation kit from Miltenyi Biotec	Single cell were dissociated from gastric tissue sample using tumor dissociation kit from Miltenyi Biotec	Single cell were dissociated from gastric tissue sample using tumor dissociation kit from Miltenyi Biotec	Single cell were dissociated from gastric tissue sample using tumor dissociation kit from Miltenyi Biotec	Single cell were dissociated from gastric tissue sample using tumor dissociation kit from Miltenyi Biotec	Single cell were dissociated from gastric tissue sample using tumor dissociation kit from Miltenyi Biotec	Single cell were dissociated from gastric tissue sample using tumor dissociation kit from Miltenyi Biotec	Single cell were dissociated from gastric tissue sample using tumor dissociation kit from Miltenyi Biotec	Single cell were dissociated from gastric tissue sample using tumor dissociation kit from Miltenyi Biotec	Single cell were dissociated from gastric tissue sample using tumor dissociation kit from Miltenyi Biotec	Single cell were dissociated from gastric tissue sample using tumor dissociation kit from Miltenyi Biotec	Single cell were dissociated from gastric tissue sample using tumor dissociation kit from Miltenyi Biotec	Single cell were dissociated from gastric tissue sample using tumor dissociation kit from Miltenyi Biotec	Single cell were dissociated from gastric tissue sample using tumor dissociation kit from Miltenyi Biotec	Single cell were dissociated from gastric tissue sample using tumor dissociation kit from Miltenyi Biotec	Single cell were dissociated from gastric tissue sample using tumor dissociation kit from Miltenyi Biotec	Single cell were dissociated from gastric tissue sample using tumor dissociation kit from Miltenyi Biotec	Single cell were dissociated from gastric tissue sample using tumor dissociation kit from Miltenyi Biotec	Single cell were dissociated from gastric tissue sample using tumor dissociation kit from Miltenyi Biotec	Single cell were dissociated from gastric tissue sample using tumor dissociation kit from Miltenyi Biotec	Single cell were dissociated from gastric tissue sample using tumor dissociation kit from Miltenyi Biotec	Single cell were dissociated from gastric tissue sample using tumor dissociation kit from Miltenyi Biotec	Single cell were dissociated from gastric tissue sample using tumor dissociation kit from Miltenyi Biotec	Single cell were dissociated from gastric tissue sample using tumor dissociation kit from Miltenyi Biotec	Single cell were dissociated from gastric tissue sample using tumor dissociation kit from Miltenyi Biotec	Single cell were dissociated from gastric tissue sample using tumor dissociation kit from Miltenyi Biotec	Single cell were dissociated from gastric tissue sample using tumor dissociation kit from Miltenyi Biotec	Single cell were dissociated from gastric tissue sample using tumor dissociation kit from Miltenyi Biotec	Single cell were dissociated from gastric tissue sample using tumor dissociation kit from Miltenyi Biotec	Single cell were dissociated from gastric tissue sample using tumor dissociation kit from Miltenyi Biotec	Single cell were dissociated from gastric tissue sample using tumor dissociation kit from Miltenyi Biotec	Single cell were dissociated from gastric tissue sample using tumor dissociation kit from Miltenyi Biotec	Single cell were dissociated from gastric tissue sample using tumor dissociation kit from Miltenyi Biotec	Single cell were dissociated from gastric tissue sample using tumor dissociation kit from Miltenyi Biotec	Single cell were dissociated from gastric tissue sample using tumor dissociation kit from Miltenyi Biotec	Single cell were dissociated from gastric tissue sample using tumor dissociation kit from Miltenyi Biotec	Single cell were dissociated from gastric tissue sample using tumor dissociation kit from Miltenyi Biotec
!Sample_extract_protocol_ch1	10x Genomics Single Cell 5′ Library kit	10x Genomics Single Cell 5′ Library kit	10x Genomics Single Cell 5′ Library kit	10x Genomics Single Cell 5′ Library kit	10x Genomics Single Cell 5′ Library kit	10x Genomics Single Cell 5′ Library kit	10x Genomics Single Cell 5′ Library kit	10x Genomics Single Cell 5′ Library kit	10x Genomics Single Cell 5′ Library kit	10x Genomics Single Cell 5′ Library kit	10x Genomics Single Cell 5′ Library kit	10x Genomics Single Cell 5′ Library kit	10x Genomics Single Cell 5′ Library kit	10x Genomics Single Cell 5′ Library kit	10x Genomics Single Cell 5′ Library kit	10x Genomics Single Cell 5′ Library kit	10x Genomics Single Cell 5′ Library kit	10x Genomics Single Cell 5′ Library kit	10x Genomics Single Cell 5′ Library kit	10x Genomics Single Cell 5′ Library kit	10x Genomics Single Cell 5′ Library kit	10x Genomics Single Cell 5′ Library kit	10x Genomics Single Cell 5′ Library kit	10x Genomics Single Cell 5′ Library kit	10x Genomics Single Cell 5′ Library kit	10x Genomics Single Cell 5′ Library kit	10x Genomics Single Cell 5′ Library kit	10x Genomics Single Cell 5′ Library kit	10x Genomics Single Cell 5′ Library kit	10x Genomics Single Cell 5′ Library kit	10x Genomics Single Cell 5′ Library kit	10x Genomics Single Cell 5′ Library kit	10x Genomics Single Cell 5′ Library kit	10x Genomics Single Cell 5′ Library kit	10x Genomics Single Cell 5′ Library kit	10x Genomics Single Cell 5′ Library kit	10x Genomics Single Cell 5′ Library kit	10x Genomics Single Cell 5′ Library kit	10x Genomics Single Cell 5′ Library kit	10x Genomics Single Cell 5′ Library kit
!Sample_taxid_ch1	9606	9606	9606	9606	9606	9606	9606	9606	9606	9606	9606	9606	9606	9606	9606	9606	9606	9606	9606	9606	9606	9606	9606	9606	9606	9606	9606	9606	9606	9606	9606	9606	9606	9606	9606	9606	9606	9606	9606	9606
!Sample_description	*** Raw files were not submitted due to patient privacy concerns ***	*** Raw files were not submitted due to patient privacy concerns ***	*** Raw files were not submitted due to patient privacy concerns ***	*** Raw files were not submitted due to patient privacy concerns ***	*** Raw files were not submitted due to patient privacy concerns ***	*** Raw files were not submitted due to patient privacy concerns ***	*** Raw files were not submitted due to patient privacy concerns ***	*** Raw files were not submitted due to patient privacy concerns ***	*** Raw files were not submitted due to patient privacy concerns ***	*** Raw files were not submitted due to patient privacy concerns ***	*** Raw files were not submitted due to patient privacy concerns ***	*** Raw files were not submitted due to patient privacy concerns ***	*** Raw files were not submitted due to patient privacy concerns ***	*** Raw files were not submitted due to patient privacy concerns ***	*** Raw files were not submitted due to patient privacy concerns ***	*** Raw files were not submitted due to patient privacy concerns ***	*** Raw files were not submitted due to patient privacy concerns ***	*** Raw files were not submitted due to patient privacy concerns ***	*** Raw files were not submitted due to patient privacy concerns ***	*** Raw files were not submitted due to patient privacy concerns ***	*** Raw files were not submitted due to patient privacy concerns ***	*** Raw files were not submitted due to patient privacy concerns ***	*** Raw files were not submitted due to patient privacy concerns ***	*** Raw files were not submitted due to patient privacy concerns ***	*** Raw files were not submitted due to patient privacy concerns ***	*** Raw files were not submitted due to patient privacy concerns ***	*** Raw files were not submitted due to patient privacy concerns ***	*** Raw files were not submitted due to patient privacy concerns ***	*** Raw files were not submitted due to patient privacy concerns ***	*** Raw files were not submitted due to patient privacy concerns ***	*** Raw files were not submitted due to patient privacy concerns ***	*** Raw files were not submitted due to patient privacy concerns ***	*** Raw files were not submitted due to patient privacy concerns ***	*** Raw files were not submitted due to patient privacy concerns ***	*** Raw files were not submitted due to patient privacy concerns ***	*** Raw files were not submitted due to patient privacy concerns ***	*** Raw files were not submitted due to patient privacy concerns ***	*** Raw files were not submitted due to patient privacy concerns ***	*** Raw files were not submitted due to patient privacy concerns ***	*** Raw files were not submitted due to patient privacy concerns ***
!Sample_data_processing	Cellranger v3.0 was used to align FASTQ sequencing reads to the hg38 reference transcriptome, generating single cell feature counts for each sample	Cellranger v3.0 was used to align FASTQ sequencing reads to the hg38 reference transcriptome, generating single cell feature counts for each sample	Cellranger v3.0 was used to align FASTQ sequencing reads to the hg38 reference transcriptome, generating single cell feature counts for each sample	Cellranger v3.0 was used to align FASTQ sequencing reads to the hg38 reference transcriptome, generating single cell feature counts for each sample	Cellranger v3.0 was used to align FASTQ sequencing reads to the hg38 reference transcriptome, generating single cell feature counts for each sample	Cellranger v3.0 was used to align FASTQ sequencing reads to the hg38 reference transcriptome, generating single cell feature counts for each sample	Cellranger v3.0 was used to align FASTQ sequencing reads to the hg38 reference transcriptome, generating single cell feature counts for each sample	Cellranger v3.0 was used to align FASTQ sequencing reads to the hg38 reference transcriptome, generating single cell feature counts for each sample	Cellranger v3.0 was used to align FASTQ sequencing reads to the hg38 reference transcriptome, generating single cell feature counts for each sample	Cellranger v3.0 was used to align FASTQ sequencing reads to the hg38 reference transcriptome, generating single cell feature counts for each sample	Cellranger v3.0 was used to align FASTQ sequencing reads to the hg38 reference transcriptome, generating single cell feature counts for each sample	Cellranger v3.0 was used to align FASTQ sequencing reads to the hg38 reference transcriptome, generating single cell feature counts for each sample	Cellranger v3.0 was used to align FASTQ sequencing reads to the hg38 reference transcriptome, generating single cell feature counts for each sample	Cellranger v3.0 was used to align FASTQ sequencing reads to the hg38 reference transcriptome, generating single cell feature counts for each sample	Cellranger v3.0 was used to align FASTQ sequencing reads to the hg38 reference transcriptome, generating single cell feature counts for each sample	Cellranger v3.0 was used to align FASTQ sequencing reads to the hg38 reference transcriptome, generating single cell feature counts for each sample	Cellranger v3.0 was used to align FASTQ sequencing reads to the hg38 reference transcriptome, generating single cell feature counts for each sample	Cellranger v3.0 was used to align FASTQ sequencing reads to the hg38 reference transcriptome, generating single cell feature counts for each sample	Cellranger v3.0 was used to align FASTQ sequencing reads to the hg38 reference transcriptome, generating single cell feature counts for each sample	Cellranger v3.0 was used to align FASTQ sequencing reads to the hg38 reference transcriptome, generating single cell feature counts for each sample	Cellranger v3.0 was used to align FASTQ sequencing reads to the hg38 reference transcriptome, generating single cell feature counts for each sample	Cellranger v3.0 was used to align FASTQ sequencing reads to the hg38 reference transcriptome, generating single cell feature counts for each sample	Cellranger v3.0 was used to align FASTQ sequencing reads to the hg38 reference transcriptome, generating single cell feature counts for each sample	Cellranger v3.0 was used to align FASTQ sequencing reads to the hg38 reference transcriptome, generating single cell feature counts for each sample	Cellranger v3.0 was used to align FASTQ sequencing reads to the hg38 reference transcriptome, generating single cell feature counts for each sample	Cellranger v3.0 was used to align FASTQ sequencing reads to the hg38 reference transcriptome, generating single cell feature counts for each sample	Cellranger v3.0 was used to align FASTQ sequencing reads to the hg38 reference transcriptome, generating single cell feature counts for each sample	Cellranger v3.0 was used to align FASTQ sequencing reads to the hg38 reference transcriptome, generating single cell feature counts for each sample	Cellranger v3.0 was used to align FASTQ sequencing reads to the hg38 reference transcriptome, generating single cell feature counts for each sample	Cellranger v3.0 was used to align FASTQ sequencing reads to the hg38 reference transcriptome, generating single cell feature counts for each sample	Cellranger v3.0 was used to align FASTQ sequencing reads to the hg38 reference transcriptome, generating single cell feature counts for each sample	Cellranger v3.0 was used to align FASTQ sequencing reads to the hg38 reference transcriptome, generating single cell feature counts for each sample	Cellranger v3.0 was used to align FASTQ sequencing reads to the hg38 reference transcriptome, generating single cell feature counts for each sample	Cellranger v3.0 was used to align FASTQ sequencing reads to the hg38 reference transcriptome, generating single cell feature counts for each sample	Cellranger v3.0 was used to align FASTQ sequencing reads to the hg38 reference transcriptome, generating single cell feature counts for each sample	Cellranger v3.0 was used to align FASTQ sequencing reads to the hg38 reference transcriptome, generating single cell feature counts for each sample	Cellranger v3.0 was used to align FASTQ sequencing reads to the hg38 reference transcriptome, generating single cell feature counts for each sample	Cellranger v3.0 was used to align FASTQ sequencing reads to the hg38 reference transcriptome, generating single cell feature counts for each sample	Cellranger v3.0 was used to align FASTQ sequencing reads to the hg38 reference transcriptome, generating single cell feature counts for each sample	Cellranger v3.0 was used to align FASTQ sequencing reads to the hg38 reference transcriptome, generating single cell feature counts for each sample
!Sample_data_processing	Using Seruat version 3.0, each sample was considered for genes/features shared by 3 or more cells, and cells showing 500 or more features and less than 6000 features. Cells with mitochondrial RNA percentages of >20 were filtered out	Using Seruat version 3.0, each sample was considered for genes/features shared by 3 or more cells, and cells showing 500 or more features and less than 6000 features. Cells with mitochondrial RNA percentages of >20 were filtered out	Using Seruat version 3.0, each sample was considered for genes/features shared by 3 or more cells, and cells showing 500 or more features and less than 6000 features. Cells with mitochondrial RNA percentages of >20 were filtered out	Using Seruat version 3.0, each sample was considered for genes/features shared by 3 or more cells, and cells showing 500 or more features and less than 6000 features. Cells with mitochondrial RNA percentages of >20 were filtered out	Using Seruat version 3.0, each sample was considered for genes/features shared by 3 or more cells, and cells showing 500 or more features and less than 6000 features. Cells with mitochondrial RNA percentages of >20 were filtered out	Using Seruat version 3.0, each sample was considered for genes/features shared by 3 or more cells, and cells showing 500 or more features and less than 6000 features. Cells with mitochondrial RNA percentages of >20 were filtered out	Using Seruat version 3.0, each sample was considered for genes/features shared by 3 or more cells, and cells showing 500 or more features and less than 6000 features. Cells with mitochondrial RNA percentages of >20 were filtered out	Using Seruat version 3.0, each sample was considered for genes/features shared by 3 or more cells, and cells showing 500 or more features and less than 6000 features. Cells with mitochondrial RNA percentages of >20 were filtered out	Using Seruat version 3.0, each sample was considered for genes/features shared by 3 or more cells, and cells showing 500 or more features and less than 6000 features. Cells with mitochondrial RNA percentages of >20 were filtered out	Using Seruat version 3.0, each sample was considered for genes/features shared by 3 or more cells, and cells showing 500 or more features and less than 6000 features. Cells with mitochondrial RNA percentages of >20 were filtered out	Using Seruat version 3.0, each sample was considered for genes/features shared by 3 or more cells, and cells showing 500 or more features and less than 6000 features. Cells with mitochondrial RNA percentages of >20 were filtered out	Using Seruat version 3.0, each sample was considered for genes/features shared by 3 or more cells, and cells showing 500 or more features and less than 6000 features. Cells with mitochondrial RNA percentages of >20 were filtered out	Using Seruat version 3.0, each sample was considered for genes/features shared by 3 or more cells, and cells showing 500 or more features and less than 6000 features. Cells with mitochondrial RNA percentages of >20 were filtered out	Using Seruat version 3.0, each sample was considered for genes/features shared by 3 or more cells, and cells showing 500 or more features and less than 6000 features. Cells with mitochondrial RNA percentages of >20 were filtered out	Using Seruat version 3.0, each sample was considered for genes/features shared by 3 or more cells, and cells showing 500 or more features and less than 6000 features. Cells with mitochondrial RNA percentages of >20 were filtered out	Using Seruat version 3.0, each sample was considered for genes/features shared by 3 or more cells, and cells showing 500 or more features and less than 6000 features. Cells with mitochondrial RNA percentages of >20 were filtered out	Using Seruat version 3.0, each sample was considered for genes/features shared by 3 or more cells, and cells showing 500 or more features and less than 6000 features. Cells with mitochondrial RNA percentages of >20 were filtered out	Using Seruat version 3.0, each sample was considered for genes/features shared by 3 or more cells, and cells showing 500 or more features and less than 6000 features. Cells with mitochondrial RNA percentages of >20 were filtered out	Using Seruat version 3.0, each sample was considered for genes/features shared by 3 or more cells, and cells showing 500 or more features and less than 6000 features. Cells with mitochondrial RNA percentages of >20 were filtered out	Using Seruat version 3.0, each sample was considered for genes/features shared by 3 or more cells, and cells showing 500 or more features and less than 6000 features. Cells with mitochondrial RNA percentages of >20 were filtered out	Using Seruat version 3.0, each sample was considered for genes/features shared by 3 or more cells, and cells showing 500 or more features and less than 6000 features. Cells with mitochondrial RNA percentages of >20 were filtered out	Using Seruat version 3.0, each sample was considered for genes/features shared by 3 or more cells, and cells showing 500 or more features and less than 6000 features. Cells with mitochondrial RNA percentages of >20 were filtered out	Using Seruat version 3.0, each sample was considered for genes/features shared by 3 or more cells, and cells showing 500 or more features and less than 6000 features. Cells with mitochondrial RNA percentages of >20 were filtered out	Using Seruat version 3.0, each sample was considered for genes/features shared by 3 or more cells, and cells showing 500 or more features and less than 6000 features. Cells with mitochondrial RNA percentages of >20 were filtered out	Using Seruat version 3.0, each sample was considered for genes/features shared by 3 or more cells, and cells showing 500 or more features and less than 6000 features. Cells with mitochondrial RNA percentages of >20 were filtered out	Using Seruat version 3.0, each sample was considered for genes/features shared by 3 or more cells, and cells showing 500 or more features and less than 6000 features. Cells with mitochondrial RNA percentages of >20 were filtered out	Using Seruat version 3.0, each sample was considered for genes/features shared by 3 or more cells, and cells showing 500 or more features and less than 6000 features. Cells with mitochondrial RNA percentages of >20 were filtered out	Using Seruat version 3.0, each sample was considered for genes/features shared by 3 or more cells, and cells showing 500 or more features and less than 6000 features. Cells with mitochondrial RNA percentages of >20 were filtered out	Using Seruat version 3.0, each sample was considered for genes/features shared by 3 or more cells, and cells showing 500 or more features and less than 6000 features. Cells with mitochondrial RNA percentages of >20 were filtered out	Using Seruat version 3.0, each sample was considered for genes/features shared by 3 or more cells, and cells showing 500 or more features and less than 6000 features. Cells with mitochondrial RNA percentages of >20 were filtered out	Using Seruat version 3.0, each sample was considered for genes/features shared by 3 or more cells, and cells showing 500 or more features and less than 6000 features. Cells with mitochondrial RNA percentages of >20 were filtered out	Using Seruat version 3.0, each sample was considered for genes/features shared by 3 or more cells, and cells showing 500 or more features and less than 6000 features. Cells with mitochondrial RNA percentages of >20 were filtered out	Using Seruat version 3.0, each sample was considered for genes/features shared by 3 or more cells, and cells showing 500 or more features and less than 6000 features. Cells with mitochondrial RNA percentages of >20 were filtered out	Using Seruat version 3.0, each sample was considered for genes/features shared by 3 or more cells, and cells showing 500 or more features and less than 6000 features. Cells with mitochondrial RNA percentages of >20 were filtered out	Using Seruat version 3.0, each sample was considered for genes/features shared by 3 or more cells, and cells showing 500 or more features and less than 6000 features. Cells with mitochondrial RNA percentages of >20 were filtered out	Using Seruat version 3.0, each sample was considered for genes/features shared by 3 or more cells, and cells showing 500 or more features and less than 6000 features. Cells with mitochondrial RNA percentages of >20 were filtered out	Using Seruat version 3.0, each sample was considered for genes/features shared by 3 or more cells, and cells showing 500 or more features and less than 6000 features. Cells with mitochondrial RNA percentages of >20 were filtered out	Using Seruat version 3.0, each sample was considered for genes/features shared by 3 or more cells, and cells showing 500 or more features and less than 6000 features. Cells with mitochondrial RNA percentages of >20 were filtered out	Using Seruat version 3.0, each sample was considered for genes/features shared by 3 or more cells, and cells showing 500 or more features and less than 6000 features. Cells with mitochondrial RNA percentages of >20 were filtered out	Using Seruat version 3.0, each sample was considered for genes/features shared by 3 or more cells, and cells showing 500 or more features and less than 6000 features. Cells with mitochondrial RNA percentages of >20 were filtered out
!Sample_data_processing	Genome_build: hg38	Genome_build: hg38	Genome_build: hg38	Genome_build: hg38	Genome_build: hg38	Genome_build: hg38	Genome_build: hg38	Genome_build: hg38	Genome_build: hg38	Genome_build: hg38	Genome_build: hg38	Genome_build: hg38	Genome_build: hg38	Genome_build: hg38	Genome_build: hg38	Genome_build: hg38	Genome_build: hg38	Genome_build: hg38	Genome_build: hg38	Genome_build: hg38	Genome_build: hg38	Genome_build: hg38	Genome_build: hg38	Genome_build: hg38	Genome_build: hg38	Genome_build: hg38	Genome_build: hg38	Genome_build: hg38	Genome_build: hg38	Genome_build: hg38	Genome_build: hg38	Genome_build: hg38	Genome_build: hg38	Genome_build: hg38	Genome_build: hg38	Genome_build: hg38	Genome_build: hg38	Genome_build: hg38	Genome_build: hg38	Genome_build: hg38
!Sample_data_processing	Supplementary_files_format_and_content: Matrix table with raw gene counts for every gene and every cell for each sample	Supplementary_files_format_and_content: Matrix table with raw gene counts for every gene and every cell for each sample	Supplementary_files_format_and_content: Matrix table with raw gene counts for every gene and every cell for each sample	Supplementary_files_format_and_content: Matrix table with raw gene counts for every gene and every cell for each sample	Supplementary_files_format_and_content: Matrix table with raw gene counts for every gene and every cell for each sample	Supplementary_files_format_and_content: Matrix table with raw gene counts for every gene and every cell for each sample	Supplementary_files_format_and_content: Matrix table with raw gene counts for every gene and every cell for each sample	Supplementary_files_format_and_content: Matrix table with raw gene counts for every gene and every cell for each sample	Supplementary_files_format_and_content: Matrix table with raw gene counts for every gene and every cell for each sample	Supplementary_files_format_and_content: Matrix table with raw gene counts for every gene and every cell for each sample	Supplementary_files_format_and_content: Matrix table with raw gene counts for every gene and every cell for each sample	Supplementary_files_format_and_content: Matrix table with raw gene counts for every gene and every cell for each sample	Supplementary_files_format_and_content: Matrix table with raw gene counts for every gene and every cell for each sample	Supplementary_files_format_and_content: Matrix table with raw gene counts for every gene and every cell for each sample	Supplementary_files_format_and_content: Matrix table with raw gene counts for every gene and every cell for each sample	Supplementary_files_format_and_content: Matrix table with raw gene counts for every gene and every cell for each sample	Supplementary_files_format_and_content: Matrix table with raw gene counts for every gene and every cell for each sample	Supplementary_files_format_and_content: Matrix table with raw gene counts for every gene and every cell for each sample	Supplementary_files_format_and_content: Matrix table with raw gene counts for every gene and every cell for each sample	Supplementary_files_format_and_content: Matrix table with raw gene counts for every gene and every cell for each sample	Supplementary_files_format_and_content: Matrix table with raw gene counts for every gene and every cell for each sample	Supplementary_files_format_and_content: Matrix table with raw gene counts for every gene and every cell for each sample	Supplementary_files_format_and_content: Matrix table with raw gene counts for every gene and every cell for each sample	Supplementary_files_format_and_content: Matrix table with raw gene counts for every gene and every cell for each sample	Supplementary_files_format_and_content: Matrix table with raw gene counts for every gene and every cell for each sample	Supplementary_files_format_and_content: Matrix table with raw gene counts for every gene and every cell for each sample	Supplementary_files_format_and_content: Matrix table with raw gene counts for every gene and every cell for each sample	Supplementary_files_format_and_content: Matrix table with raw gene counts for every gene and every cell for each sample	Supplementary_files_format_and_content: Matrix table with raw gene counts for every gene and every cell for each sample	Supplementary_files_format_and_content: Matrix table with raw gene counts for every gene and every cell for each sample	Supplementary_files_format_and_content: Matrix table with raw gene counts for every gene and every cell for each sample	Supplementary_files_format_and_content: Matrix table with raw gene counts for every gene and every cell for each sample	Supplementary_files_format_and_content: Matrix table with raw gene counts for every gene and every cell for each sample	Supplementary_files_format_and_content: Matrix table with raw gene counts for every gene and every cell for each sample	Supplementary_files_format_and_content: Matrix table with raw gene counts for every gene and every cell for each sample	Supplementary_files_format_and_content: Matrix table with raw gene counts for every gene and every cell for each sample	Supplementary_files_format_and_content: Matrix table with raw gene counts for every gene and every cell for each sample	Supplementary_files_format_and_content: Matrix table with raw gene counts for every gene and every cell for each sample	Supplementary_files_format_and_content: Matrix table with raw gene counts for every gene and every cell for each sample	Supplementary_files_format_and_content: Matrix table with raw gene counts for every gene and every cell for each sample
!Sample_platform_id	GPL24676	GPL24676	GPL24676	GPL24676	GPL24676	GPL24676	GPL24676	GPL24676	GPL24676	GPL24676	GPL24676	GPL24676	GPL24676	GPL24676	GPL24676	GPL24676	GPL24676	GPL24676	GPL24676	GPL24676	GPL24676	GPL24676	GPL24676	GPL24676	GPL24676	GPL24676	GPL24676	GPL24676	GPL24676	GPL24676	GPL24676	GPL24676	GPL24676	GPL24676	GPL24676	GPL24676	GPL24676	GPL24676	GPL24676	GPL24676
!Sample_contact_name	Kie Kyon,,Huang	Kie Kyon,,Huang	Kie Kyon,,Huang	Kie Kyon,,Huang	Kie Kyon,,Huang	Kie Kyon,,Huang	Kie Kyon,,Huang	Kie Kyon,,Huang	Kie Kyon,,Huang	Kie Kyon,,Huang	Kie Kyon,,Huang	Kie Kyon,,Huang	Kie Kyon,,Huang	Kie Kyon,,Huang	Kie Kyon,,Huang	Kie Kyon,,Huang	Kie Kyon,,Huang	Kie Kyon,,Huang	Kie Kyon,,Huang	Kie Kyon,,Huang	Kie Kyon,,Huang	Kie Kyon,,Huang	Kie Kyon,,Huang	Kie Kyon,,Huang	Kie Kyon,,Huang	Kie Kyon,,Huang	Kie Kyon,,Huang	Kie Kyon,,Huang	Kie Kyon,,Huang	Kie Kyon,,Huang	Kie Kyon,,Huang	Kie Kyon,,Huang	Kie Kyon,,Huang	Kie Kyon,,Huang	Kie Kyon,,Huang	Kie Kyon,,Huang	Kie Kyon,,Huang	Kie Kyon,,Huang	Kie Kyon,,Huang	Kie Kyon,,Huang
!Sample_contact_email	kiekyon.huang@gmail.com	kiekyon.huang@gmail.com	kiekyon.huang@gmail.com	kiekyon.huang@gmail.com	kiekyon.huang@gmail.com	kiekyon.huang@gmail.com	kiekyon.huang@gmail.com	kiekyon.huang@gmail.com	kiekyon.huang@gmail.com	kiekyon.huang@gmail.com	kiekyon.huang@gmail.com	kiekyon.huang@gmail.com	kiekyon.huang@gmail.com	kiekyon.huang@gmail.com	kiekyon.huang@gmail.com	kiekyon.huang@gmail.com	kiekyon.huang@gmail.com	kiekyon.huang@gmail.com	kiekyon.huang@gmail.com	kiekyon.huang@gmail.com	kiekyon.huang@gmail.com	kiekyon.huang@gmail.com	kiekyon.huang@gmail.com	kiekyon.huang@gmail.com	kiekyon.huang@gmail.com	kiekyon.huang@gmail.com	kiekyon.huang@gmail.com	kiekyon.huang@gmail.com	kiekyon.huang@gmail.com	kiekyon.huang@gmail.com	kiekyon.huang@gmail.com	kiekyon.huang@gmail.com	kiekyon.huang@gmail.com	kiekyon.huang@gmail.com	kiekyon.huang@gmail.com	kiekyon.huang@gmail.com	kiekyon.huang@gmail.com	kiekyon.huang@gmail.com	kiekyon.huang@gmail.com	kiekyon.huang@gmail.com
!Sample_contact_institute	Duke-NUS Graduate Medical School	Duke-NUS Graduate Medical School	Duke-NUS Graduate Medical School	Duke-NUS Graduate Medical School	Duke-NUS Graduate Medical School	Duke-NUS Graduate Medical School	Duke-NUS Graduate Medical School	Duke-NUS Graduate Medical School	Duke-NUS Graduate Medical School	Duke-NUS Graduate Medical School	Duke-NUS Graduate Medical School	Duke-NUS Graduate Medical School	Duke-NUS Graduate Medical School	Duke-NUS Graduate Medical School	Duke-NUS Graduate Medical School	Duke-NUS Graduate Medical School	Duke-NUS Graduate Medical School	Duke-NUS Graduate Medical School	Duke-NUS Graduate Medical School	Duke-NUS Graduate Medical School	Duke-NUS Graduate Medical School	Duke-NUS Graduate Medical School	Duke-NUS Graduate Medical School	Duke-NUS Graduate Medical School	Duke-NUS Graduate Medical School	Duke-NUS Graduate Medical School	Duke-NUS Graduate Medical School	Duke-NUS Graduate Medical School	Duke-NUS Graduate Medical School	Duke-NUS Graduate Medical School	Duke-NUS Graduate Medical School	Duke-NUS Graduate Medical School	Duke-NUS Graduate Medical School	Duke-NUS Graduate Medical School	Duke-NUS Graduate Medical School	Duke-NUS Graduate Medical School	Duke-NUS Graduate Medical School	Duke-NUS Graduate Medical School	Duke-NUS Graduate Medical School	Duke-NUS Graduate Medical School
!Sample_contact_address	8 College Road	8 College Road	8 College Road	8 College Road	8 College Road	8 College Road	8 College Road	8 College Road	8 College Road	8 College Road	8 College Road	8 College Road	8 College Road	8 College Road	8 College Road	8 College Road	8 College Road	8 College Road	8 College Road	8 College Road	8 College Road	8 College Road	8 College Road	8 College Road	8 College Road	8 College Road	8 College Road	8 College Road	8 College Road	8 College Road	8 College Road	8 College Road	8 College Road	8 College Road	8 College Road	8 College Road	8 College Road	8 College Road	8 College Road	8 College Road
!Sample_contact_city	Singapore	Singapore	Singapore	Singapore	Singapore	Singapore	Singapore	Singapore	Singapore	Singapore	Singapore	Singapore	Singapore	Singapore	Singapore	Singapore	Singapore	Singapore	Singapore	Singapore	Singapore	Singapore	Singapore	Singapore	Singapore	Singapore	Singapore	Singapore	Singapore	Singapore	Singapore	Singapore	Singapore	Singapore	Singapore	Singapore	Singapore	Singapore	Singapore	Singapore
!Sample_contact_state	Select State/Province	Select State/Province	Select State/Province	Select State/Province	Select State/Province	Select State/Province	Select State/Province	Select State/Province	Select State/Province	Select State/Province	Select State/Province	Select State/Province	Select State/Province	Select State/Province	Select State/Province	Select State/Province	Select State/Province	Select State/Province	Select State/Province	Select State/Province	Select State/Province	Select State/Province	Select State/Province	Select State/Province	Select State/Province	Select State/Province	Select State/Province	Select State/Province	Select State/Province	Select State/Province	Select State/Province	Select State/Province	Select State/Province	Select State/Province	Select State/Province	Select State/Province	Select State/Province	Select State/Province	Select State/Province	Select State/Province
!Sample_contact_zip/postal_code	169857	169857	169857	169857	169857	169857	169857	169857	169857	169857	169857	169857	169857	169857	169857	169857	169857	169857	169857	169857	169857	169857	169857	169857	169857	169857	169857	169857	169857	169857	169857	169857	169857	169857	169857	169857	169857	169857	169857	169857
!Sample_contact_country	Singapore	Singapore	Singapore	Singapore	Singapore	Singapore	Singapore	Singapore	Singapore	Singapore	Singapore	Singapore	Singapore	Singapore	Singapore	Singapore	Singapore	Singapore	Singapore	Singapore	Singapore	Singapore	Singapore	Singapore	Singapore	Singapore	Singapore	Singapore	Singapore	Singapore	Singapore	Singapore	Singapore	Singapore	Singapore	Singapore	Singapore	Singapore	Singapore	Singapore
!Sample_data_row_count	0	0	0	0	0	0	0	0	0	0	0	0	0	0	0	0	0	0	0	0	0	0	0	0	0	0	0	0	0	0	0	0	0	0	0	0	0	0	0	0
!Sample_instrument_model	Illumina NovaSeq 6000	Illumina NovaSeq 6000	Illumina NovaSeq 6000	Illumina NovaSeq 6000	Illumina NovaSeq 6000	Illumina NovaSeq 6000	Illumina NovaSeq 6000	Illumina NovaSeq 6000	Illumina NovaSeq 6000	Illumina NovaSeq 6000	Illumina NovaSeq 6000	Illumina NovaSeq 6000	Illumina NovaSeq 6000	Illumina NovaSeq 6000	Illumina NovaSeq 6000	Illumina NovaSeq 6000	Illumina NovaSeq 6000	Illumina NovaSeq 6000	Illumina NovaSeq 6000	Illumina NovaSeq 6000	Illumina NovaSeq 6000	Illumina NovaSeq 6000	Illumina NovaSeq 6000	Illumina NovaSeq 6000	Illumina NovaSeq 6000	Illumina NovaSeq 6000	Illumina NovaSeq 6000	Illumina NovaSeq 6000	Illumina NovaSeq 6000	Illumina NovaSeq 6000	Illumina NovaSeq 6000	Illumina NovaSeq 6000	Illumina NovaSeq 6000	Illumina NovaSeq 6000	Illumina NovaSeq 6000	Illumina NovaSeq 6000	Illumina NovaSeq 6000	Illumina NovaSeq 6000	Illumina NovaSeq 6000	Illumina NovaSeq 6000
!Sample_library_selection	cDNA	cDNA	cDNA	cDNA	cDNA	cDNA	cDNA	cDNA	cDNA	cDNA	cDNA	cDNA	cDNA	cDNA	cDNA	cDNA	cDNA	cDNA	cDNA	cDNA	cDNA	cDNA	cDNA	cDNA	cDNA	cDNA	cDNA	cDNA	cDNA	cDNA	cDNA	cDNA	cDNA	cDNA	cDNA	cDNA	cDNA	cDNA	cDNA	cDNA
!Sample_library_source	transcriptomic	transcriptomic	transcriptomic	transcriptomic	transcriptomic	transcriptomic	transcriptomic	transcriptomic	transcriptomic	transcriptomic	transcriptomic	transcriptomic	transcriptomic	transcriptomic	transcriptomic	transcriptomic	transcriptomic	transcriptomic	transcriptomic	transcriptomic	transcriptomic	transcriptomic	transcriptomic	transcriptomic	transcriptomic	transcriptomic	transcriptomic	transcriptomic	transcriptomic	transcriptomic	transcriptomic	transcriptomic	transcriptomic	transcriptomic	transcriptomic	transcriptomic	transcriptomic	transcriptomic	transcriptomic	transcriptomic
!Sample_library_strategy	RNA-Seq	RNA-Seq	RNA-Seq	RNA-Seq	RNA-Seq	RNA-Seq	RNA-Seq	RNA-Seq	RNA-Seq	RNA-Seq	RNA-Seq	RNA-Seq	RNA-Seq	RNA-Seq	RNA-Seq	RNA-Seq	RNA-Seq	RNA-Seq	RNA-Seq	RNA-Seq	RNA-Seq	RNA-Seq	RNA-Seq	RNA-Seq	RNA-Seq	RNA-Seq	RNA-Seq	RNA-Seq	RNA-Seq	RNA-Seq	RNA-Seq	RNA-Seq	RNA-Seq	RNA-Seq	RNA-Seq	RNA-Seq	RNA-Seq	RNA-Seq	RNA-Seq	RNA-Seq
!Sample_relation	BioSample: https://www.ncbi.nlm.nih.gov/biosample/SAMN21385761	BioSample: https://www.ncbi.nlm.nih.gov/biosample/SAMN21385762	BioSample: https://www.ncbi.nlm.nih.gov/biosample/SAMN21385763	BioSample: https://www.ncbi.nlm.nih.gov/biosample/SAMN21385764	BioSample: https://www.ncbi.nlm.nih.gov/biosample/SAMN21385765	BioSample: https://www.ncbi.nlm.nih.gov/biosample/SAMN21385768	BioSample: https://www.ncbi.nlm.nih.gov/biosample/SAMN21385766	BioSample: https://www.ncbi.nlm.nih.gov/biosample/SAMN21385767	BioSample: https://www.ncbi.nlm.nih.gov/biosample/SAMN21385769	BioSample: https://www.ncbi.nlm.nih.gov/biosample/SAMN21385770	BioSample: https://www.ncbi.nlm.nih.gov/biosample/SAMN21385771	BioSample: https://www.ncbi.nlm.nih.gov/biosample/SAMN21385772	BioSample: https://www.ncbi.nlm.nih.gov/biosample/SAMN21385773	BioSample: https://www.ncbi.nlm.nih.gov/biosample/SAMN21385774	BioSample: https://www.ncbi.nlm.nih.gov/biosample/SAMN21385775	BioSample: https://www.ncbi.nlm.nih.gov/biosample/SAMN21385776	BioSample: https://www.ncbi.nlm.nih.gov/biosample/SAMN21385777	BioSample: https://www.ncbi.nlm.nih.gov/biosample/SAMN21385778	BioSample: https://www.ncbi.nlm.nih.gov/biosample/SAMN21385779	BioSample: https://www.ncbi.nlm.nih.gov/biosample/SAMN21385780	BioSample: https://www.ncbi.nlm.nih.gov/biosample/SAMN21385781	BioSample: https://www.ncbi.nlm.nih.gov/biosample/SAMN21385782	BioSample: https://www.ncbi.nlm.nih.gov/biosample/SAMN21385783	BioSample: https://www.ncbi.nlm.nih.gov/biosample/SAMN21385784	BioSample: https://www.ncbi.nlm.nih.gov/biosample/SAMN21385785	BioSample: https://www.ncbi.nlm.nih.gov/biosample/SAMN21385786	BioSample: https://www.ncbi.nlm.nih.gov/biosample/SAMN21385787	BioSample: https://www.ncbi.nlm.nih.gov/biosample/SAMN21385788	BioSample: https://www.ncbi.nlm.nih.gov/biosample/SAMN21385789	BioSample: https://www.ncbi.nlm.nih.gov/biosample/SAMN21385790	BioSample: https://www.ncbi.nlm.nih.gov/biosample/SAMN21385791	BioSample: https://www.ncbi.nlm.nih.gov/biosample/SAMN21385792	BioSample: https://www.ncbi.nlm.nih.gov/biosample/SAMN21385793	BioSample: https://www.ncbi.nlm.nih.gov/biosample/SAMN21385794	BioSample: https://www.ncbi.nlm.nih.gov/biosample/SAMN21385795	BioSample: https://www.ncbi.nlm.nih.gov/biosample/SAMN21385798	BioSample: https://www.ncbi.nlm.nih.gov/biosample/SAMN21385747	BioSample: https://www.ncbi.nlm.nih.gov/biosample/SAMN21385749	BioSample: https://www.ncbi.nlm.nih.gov/biosample/SAMN21385796	BioSample: https://www.ncbi.nlm.nih.gov/biosample/SAMN21385797
!Sample_supplementary_file_1	ftp://ftp.ncbi.nlm.nih.gov/geo/samples/GSM5573nnn/GSM5573466/suppl/GSM5573466_sample1.csv.gz	ftp://ftp.ncbi.nlm.nih.gov/geo/samples/GSM5573nnn/GSM5573467/suppl/GSM5573467_sample2.csv.gz	ftp://ftp.ncbi.nlm.nih.gov/geo/samples/GSM5573nnn/GSM5573468/suppl/GSM5573468_sample3.csv.gz	ftp://ftp.ncbi.nlm.nih.gov/geo/samples/GSM5573nnn/GSM5573469/suppl/GSM5573469_sample4.csv.gz	ftp://ftp.ncbi.nlm.nih.gov/geo/samples/GSM5573nnn/GSM5573470/suppl/GSM5573470_sample5.csv.gz	ftp://ftp.ncbi.nlm.nih.gov/geo/samples/GSM5573nnn/GSM5573471/suppl/GSM5573471_sample6.csv.gz	ftp://ftp.ncbi.nlm.nih.gov/geo/samples/GSM5573nnn/GSM5573472/suppl/GSM5573472_sample7.csv.gz	ftp://ftp.ncbi.nlm.nih.gov/geo/samples/GSM5573nnn/GSM5573473/suppl/GSM5573473_sample8.csv.gz	ftp://ftp.ncbi.nlm.nih.gov/geo/samples/GSM5573nnn/GSM5573474/suppl/GSM5573474_sample9.csv.gz	ftp://ftp.ncbi.nlm.nih.gov/geo/samples/GSM5573nnn/GSM5573475/suppl/GSM5573475_sample10.csv.gz	ftp://ftp.ncbi.nlm.nih.gov/geo/samples/GSM5573nnn/GSM5573476/suppl/GSM5573476_sample11.csv.gz	ftp://ftp.ncbi.nlm.nih.gov/geo/samples/GSM5573nnn/GSM5573477/suppl/GSM5573477_sample12.csv.gz	ftp://ftp.ncbi.nlm.nih.gov/geo/samples/GSM5573nnn/GSM5573478/suppl/GSM5573478_sample13.csv.gz	ftp://ftp.ncbi.nlm.nih.gov/geo/samples/GSM5573nnn/GSM5573479/suppl/GSM5573479_sample14.csv.gz	ftp://ftp.ncbi.nlm.nih.gov/geo/samples/GSM5573nnn/GSM5573480/suppl/GSM5573480_sample15.csv.gz	ftp://ftp.ncbi.nlm.nih.gov/geo/samples/GSM5573nnn/GSM5573481/suppl/GSM5573481_sample16.csv.gz	ftp://ftp.ncbi.nlm.nih.gov/geo/samples/GSM5573nnn/GSM5573482/suppl/GSM5573482_sample17.csv.gz	ftp://ftp.ncbi.nlm.nih.gov/geo/samples/GSM5573nnn/GSM5573483/suppl/GSM5573483_sample18.csv.gz	ftp://ftp.ncbi.nlm.nih.gov/geo/samples/GSM5573nnn/GSM5573484/suppl/GSM5573484_sample19.csv.gz	ftp://ftp.ncbi.nlm.nih.gov/geo/samples/GSM5573nnn/GSM5573485/suppl/GSM5573485_sample20.csv.gz	ftp://ftp.ncbi.nlm.nih.gov/geo/samples/GSM5573nnn/GSM5573486/suppl/GSM5573486_sample21.csv.gz	ftp://ftp.ncbi.nlm.nih.gov/geo/samples/GSM5573nnn/GSM5573487/suppl/GSM5573487_sample22.csv.gz	ftp://ftp.ncbi.nlm.nih.gov/geo/samples/GSM5573nnn/GSM5573488/suppl/GSM5573488_sample23.csv.gz	ftp://ftp.ncbi.nlm.nih.gov/geo/samples/GSM5573nnn/GSM5573489/suppl/GSM5573489_sample24.csv.gz	ftp://ftp.ncbi.nlm.nih.gov/geo/samples/GSM5573nnn/GSM5573490/suppl/GSM5573490_sample25.csv.gz	ftp://ftp.ncbi.nlm.nih.gov/geo/samples/GSM5573nnn/GSM5573491/suppl/GSM5573491_sample26.csv.gz	ftp://ftp.ncbi.nlm.nih.gov/geo/samples/GSM5573nnn/GSM5573492/suppl/GSM5573492_sample27.csv.gz	ftp://ftp.ncbi.nlm.nih.gov/geo/samples/GSM5573nnn/GSM5573493/suppl/GSM5573493_sample28.csv.gz	ftp://ftp.ncbi.nlm.nih.gov/geo/samples/GSM5573nnn/GSM5573494/suppl/GSM5573494_sample29.csv.gz	ftp://ftp.ncbi.nlm.nih.gov/geo/samples/GSM5573nnn/GSM5573495/suppl/GSM5573495_sample30.csv.gz	ftp://ftp.ncbi.nlm.nih.gov/geo/samples/GSM5573nnn/GSM5573496/suppl/GSM5573496_sample31.csv.gz	ftp://ftp.ncbi.nlm.nih.gov/geo/samples/GSM5573nnn/GSM5573497/suppl/GSM5573497_sample32.csv.gz	ftp://ftp.ncbi.nlm.nih.gov/geo/samples/GSM5573nnn/GSM5573498/suppl/GSM5573498_sample33.csv.gz	ftp://ftp.ncbi.nlm.nih.gov/geo/samples/GSM5573nnn/GSM5573499/suppl/GSM5573499_sample34.csv.gz	ftp://ftp.ncbi.nlm.nih.gov/geo/samples/GSM5573nnn/GSM5573500/suppl/GSM5573500_sample35.csv.gz	ftp://ftp.ncbi.nlm.nih.gov/geo/samples/GSM5573nnn/GSM5573501/suppl/GSM5573501_sample36.csv.gz	ftp://ftp.ncbi.nlm.nih.gov/geo/samples/GSM5573nnn/GSM5573502/suppl/GSM5573502_sample37.csv.gz	ftp://ftp.ncbi.nlm.nih.gov/geo/samples/GSM5573nnn/GSM5573503/suppl/GSM5573503_sample38.csv.gz	ftp://ftp.ncbi.nlm.nih.gov/geo/samples/GSM5573nnn/GSM5573504/suppl/GSM5573504_sample39.csv.gz	ftp://ftp.ncbi.nlm.nih.gov/geo/samples/GSM5573nnn/GSM5573505/suppl/GSM5573505_sample40.csv.gz
!series_matrix_table_begin
ID_REF	GSM5573466	GSM5573467	GSM5573468	GSM5573469	GSM5573470	GSM5573471	GSM5573472	GSM5573473	GSM5573474	GSM5573475	GSM5573476	GSM5573477	GSM5573478	GSM5573479	GSM5573480	GSM5573481	GSM5573482	GSM5573483	GSM5573484	GSM5573485	GSM5573486	GSM5573487	GSM5573488	GSM5573489	GSM5573490	GSM5573491	GSM5573492	GSM5573493	GSM5573494	GSM5573495	GSM5573496	GSM5573497	GSM5573498	GSM5573499	GSM5573500	GSM5573501	GSM5573502	GSM5573503	GSM5573504	GSM5573505
!series_matrix_table_end

## Sheet: Sheet2
!Sample_title	!Sample_geo_accession	!Sample_status	!Sample_submission_date	!Sample_last_update_date	!Sample_type	!Sample_channel_count	!Sample_source_name_ch1	!Sample_organism_ch1	!Sample_characteristics_ch1	!Sample_molecule_ch1	!Sample_extract_protocol_ch1	!Sample_extract_protocol_ch1	!Sample_taxid_ch1	!Sample_description	!Sample_data_processing	!Sample_data_processing	!Sample_data_processing	!Sample_data_processing	!Sample_platform_id	!Sample_contact_name	!Sample_contact_email	!Sample_contact_institute	!Sample_contact_address	!Sample_contact_city	!Sample_contact_state	!Sample_contact_zip/postal_code	!Sample_contact_country	!Sample_data_row_count	!Sample_instrument_model	!Sample_library_selection	!Sample_library_source	!Sample_library_strategy	!Sample_relation	!Sample_supplementary_file_1	!series_matrix_table_begin	ID_REF	!series_matrix_table_end
sample1: Primary Gastric Tissue (Normal)	GSM5573466	Public on Oct 05 2021	Sep 10 2021	Oct 07 2021	SRA	1	Stomach	Homo sapiens	tissue: Primary Gastric Tissue (Normal)	polyA RNA	Single cell were dissociated from gastric tissue sample using tumor dissociation kit from Miltenyi Biotec	10x Genomics Single Cell 5′ Library kit	9606	*** Raw files were not submitted due to patient privacy concerns ***	Cellranger v3.0 was used to align FASTQ sequencing reads to the hg38 reference transcriptome, generating single cell feature counts for each sample	Using Seruat version 3.0, each sample was considered for genes/features shared by 3 or more cells, and cells showing 500 or more features and less than 6000 features. Cells with mitochondrial RNA percentages of >20 were filtered out	Genome_build: hg38	Supplementary_files_format_and_content: Matrix table with raw gene counts for every gene and every cell for each sample	GPL24676	Kie Kyon,,Huang	kiekyon.huang@gmail.com	Duke-NUS Graduate Medical School	8 College Road	Singapore	Select State/Province	169857	Singapore	0	Illumina NovaSeq 6000	cDNA	transcriptomic	RNA-Seq	BioSample: https://www.ncbi.nlm.nih.gov/biosample/SAMN21385761	ftp://ftp.ncbi.nlm.nih.gov/geo/samples/GSM5573nnn/GSM5573466/suppl/GSM5573466_sample1.csv.gz		GSM5573466
sample2: Primary Gastric Tissue (Tumor)	GSM5573467	Public on Oct 05 2021	Sep 10 2021	Oct 07 2021	SRA	1	Stomach	Homo sapiens	tissue: Primary Gastric Tissue (Tumor)	polyA RNA	Single cell were dissociated from gastric tissue sample using tumor dissociation kit from Miltenyi Biotec	10x Genomics Single Cell 5′ Library kit	9606	*** Raw files were not submitted due to patient privacy concerns ***	Cellranger v3.0 was used to align FASTQ sequencing reads to the hg38 reference transcriptome, generating single cell feature counts for each sample	Using Seruat version 3.0, each sample was considered for genes/features shared by 3 or more cells, and cells showing 500 or more features and less than 6000 features. Cells with mitochondrial RNA percentages of >20 were filtered out	Genome_build: hg38	Supplementary_files_format_and_content: Matrix table with raw gene counts for every gene and every cell for each sample	GPL24676	Kie Kyon,,Huang	kiekyon.huang@gmail.com	Duke-NUS Graduate Medical School	8 College Road	Singapore	Select State/Province	169857	Singapore	0	Illumina NovaSeq 6000	cDNA	transcriptomic	RNA-Seq	BioSample: https://www.ncbi.nlm.nih.gov/biosample/SAMN21385762	ftp://ftp.ncbi.nlm.nih.gov/geo/samples/GSM5573nnn/GSM5573467/suppl/GSM5573467_sample2.csv.gz		GSM5573467
sample3: Primary Gastric Tissue (Tumor)	GSM5573468	Public on Oct 05 2021	Sep 10 2021	Oct 07 2021	SRA	1	Stomach	Homo sapiens	tissue: Primary Gastric Tissue (Tumor)	polyA RNA	Single cell were dissociated from gastric tissue sample using tumor dissociation kit from Miltenyi Biotec	10x Genomics Single Cell 5′ Library kit	9606	*** Raw files were not submitted due to patient privacy concerns ***	Cellranger v3.0 was used to align FASTQ sequencing reads to the hg38 reference transcriptome, generating single cell feature counts for each sample	Using Seruat version 3.0, each sample was considered for genes/features shared by 3 or more cells, and cells showing 500 or more features and less than 6000 features. Cells with mitochondrial RNA percentages of >20 were filtered out	Genome_build: hg38	Supplementary_files_format_and_content: Matrix table with raw gene counts for every gene and every cell for each sample	GPL24676	Kie Kyon,,Huang	kiekyon.huang@gmail.com	Duke-NUS Graduate Medical School	8 College Road	Singapore	Select State/Province	169857	Singapore	0	Illumina NovaSeq 6000	cDNA	transcriptomic	RNA-Seq	BioSample: https://www.ncbi.nlm.nih.gov/biosample/SAMN21385763	ftp://ftp.ncbi.nlm.nih.gov/geo/samples/GSM5573nnn/GSM5573468/suppl/GSM5573468_sample3.csv.gz		GSM5573468
sample4: Primary Gastric Tissue (Normal)	GSM5573469	Public on Oct 05 2021	Sep 10 2021	Oct 07 2021	SRA	1	Stomach	Homo sapiens	tissue: Primary Gastric Tissue (Normal)	polyA RNA	Single cell were dissociated from gastric tissue sample using tumor dissociation kit from Miltenyi Biotec	10x Genomics Single Cell 5′ Library kit	9606	*** Raw files were not submitted due to patient privacy concerns ***	Cellranger v3.0 was used to align FASTQ sequencing reads to the hg38 reference transcriptome, generating single cell feature counts for each sample	Using Seruat version 3.0, each sample was considered for genes/features shared by 3 or more cells, and cells showing 500 or more features and less than 6000 features. Cells with mitochondrial RNA percentages of >20 were filtered out	Genome_build: hg38	Supplementary_files_format_and_content: Matrix table with raw gene counts for every gene and every cell for each sample	GPL24676	Kie Kyon,,Huang	kiekyon.huang@gmail.com	Duke-NUS Graduate Medical School	8 College Road	Singapore	Select State/Province	169857	Singapore	0	Illumina NovaSeq 6000	cDNA	transcriptomic	RNA-Seq	BioSample: https://www.ncbi.nlm.nih.gov/biosample/SAMN21385764	ftp://ftp.ncbi.nlm.nih.gov/geo/samples/GSM5573nnn/GSM5573469/suppl/GSM5573469_sample4.csv.gz		GSM5573469
sample5: Primary Gastric Tissue (Tumor)	GSM5573470	Public on Oct 05 2021	Sep 10 2021	Oct 07 2021	SRA	1	Stomach	Homo sapiens	tissue: Primary Gastric Tissue (Tumor)	polyA RNA	Single cell were dissociated from gastric tissue sample using tumor dissociation kit from Miltenyi Biotec	10x Genomics Single Cell 5′ Library kit	9606	*** Raw files were not submitted due to patient privacy concerns ***	Cellranger v3.0 was used to align FASTQ sequencing reads to the hg38 reference transcriptome, generating single cell feature counts for each sample	Using Seruat version 3.0, each sample was considered for genes/features shared by 3 or more cells, and cells showing 500 or more features and less than 6000 features. Cells with mitochondrial RNA percentages of >20 were filtered out	Genome_build: hg38	Supplementary_files_format_and_content: Matrix table with raw gene counts for every gene and every cell for each sample	GPL24676	Kie Kyon,,Huang	kiekyon.huang@gmail.com	Duke-NUS Graduate Medical School	8 College Road	Singapore	Select State/Province	169857	Singapore	0	Illumina NovaSeq 6000	cDNA	transcriptomic	RNA-Seq	BioSample: https://www.ncbi.nlm.nih.gov/biosample/SAMN21385765	ftp://ftp.ncbi.nlm.nih.gov/geo/samples/GSM5573nnn/GSM5573470/suppl/GSM5573470_sample5.csv.gz		GSM5573470
sample6: Primary Gastric Tissue (Normal)	GSM5573471	Public on Oct 05 2021	Sep 10 2021	Oct 07 2021	SRA	1	Stomach	Homo sapiens	tissue: Primary Gastric Tissue (Normal)	polyA RNA	Single cell were dissociated from gastric tissue sample using tumor dissociation kit from Miltenyi Biotec	10x Genomics Single Cell 5′ Library kit	9606	*** Raw files were not submitted due to patient privacy concerns ***	Cellranger v3.0 was used to align FASTQ sequencing reads to the hg38 reference transcriptome, generating single cell feature counts for each sample	Using Seruat version 3.0, each sample was considered for genes/features shared by 3 or more cells, and cells showing 500 or more features and less than 6000 features. Cells with mitochondrial RNA percentages of >20 were filtered out	Genome_build: hg38	Supplementary_files_format_and_content: Matrix table with raw gene counts for every gene and every cell for each sample	GPL24676	Kie Kyon,,Huang	kiekyon.huang@gmail.com	Duke-NUS Graduate Medical School	8 College Road	Singapore	Select State/Province	169857	Singapore	0	Illumina NovaSeq 6000	cDNA	transcriptomic	RNA-Seq	BioSample: https://www.ncbi.nlm.nih.gov/biosample/SAMN21385768	ftp://ftp.ncbi.nlm.nih.gov/geo/samples/GSM5573nnn/GSM5573471/suppl/GSM5573471_sample6.csv.gz		GSM5573471
sample7: Primary Gastric Tissue (Tumor)	GSM5573472	Public on Oct 05 2021	Sep 10 2021	Oct 07 2021	SRA	1	Stomach	Homo sapiens	tissue: Primary Gastric Tissue (Tumor)	polyA RNA	Single cell were dissociated from gastric tissue sample using tumor dissociation kit from Miltenyi Biotec	10x Genomics Single Cell 5′ Library kit	9606	*** Raw files were not submitted due to patient privacy concerns ***	Cellranger v3.0 was used to align FASTQ sequencing reads to the hg38 reference transcriptome, generating single cell feature counts for each sample	Using Seruat version 3.0, each sample was considered for genes/features shared by 3 or more cells, and cells showing 500 or more features and less than 6000 features. Cells with mitochondrial RNA percentages of >20 were filtered out	Genome_build: hg38	Supplementary_files_format_and_content: Matrix table with raw gene counts for every gene and every cell for each sample	GPL24676	Kie Kyon,,Huang	kiekyon.huang@gmail.com	Duke-NUS Graduate Medical School	8 College Road	Singapore	Select State/Province	169857	Singapore	0	Illumina NovaSeq 6000	cDNA	transcriptomic	RNA-Seq	BioSample: https://www.ncbi.nlm.nih.gov/biosample/SAMN21385766	ftp://ftp.ncbi.nlm.nih.gov/geo/samples/GSM5573nnn/GSM5573472/suppl/GSM5573472_sample7.csv.gz		GSM5573472
sample8: Primary Gastric Tissue (Tumor)	GSM5573473	Public on Oct 05 2021	Sep 10 2021	Oct 07 2021	SRA	1	Stomach	Homo sapiens	tissue: Primary Gastric Tissue (Tumor)	polyA RNA	Single cell were dissociated from gastric tissue sample using tumor dissociation kit from Miltenyi Biotec	10x Genomics Single Cell 5′ Library kit	9606	*** Raw files were not submitted due to patient privacy concerns ***	Cellranger v3.0 was used to align FASTQ sequencing reads to the hg38 reference transcriptome, generating single cell feature counts for each sample	Using Seruat version 3.0, each sample was considered for genes/features shared by 3 or more cells, and cells showing 500 or more features and less than 6000 features. Cells with mitochondrial RNA percentages of >20 were filtered out	Genome_build: hg38	Supplementary_files_format_and_content: Matrix table with raw gene counts for every gene and every cell for each sample	GPL24676	Kie Kyon,,Huang	kiekyon.huang@gmail.com	Duke-NUS Graduate Medical School	8 College Road	Singapore	Select State/Province	169857	Singapore	0	Illumina NovaSeq 6000	cDNA	transcriptomic	RNA-Seq	BioSample: https://www.ncbi.nlm.nih.gov/biosample/SAMN21385767	ftp://ftp.ncbi.nlm.nih.gov/geo/samples/GSM5573nnn/GSM5573473/suppl/GSM5573473_sample8.csv.gz		GSM5573473
sample9: Primary Gastric Tissue (Normal)	GSM5573474	Public on Oct 05 2021	Sep 10 2021	Oct 07 2021	SRA	1	Stomach	Homo sapiens	tissue: Primary Gastric Tissue (Normal)	polyA RNA	Single cell were dissociated from gastric tissue sample using tumor dissociation kit from Miltenyi Biotec	10x Genomics Single Cell 5′ Library kit	9606	*** Raw files were not submitted due to patient privacy concerns ***	Cellranger v3.0 was used to align FASTQ sequencing reads to the hg38 reference transcriptome, generating single cell feature counts for each sample	Using Seruat version 3.0, each sample was considered for genes/features shared by 3 or more cells, and cells showing 500 or more features and less than 6000 features. Cells with mitochondrial RNA percentages of >20 were filtered out	Genome_build: hg38	Supplementary_files_format_and_content: Matrix table with raw gene counts for every gene and every cell for each sample	GPL24676	Kie Kyon,,Huang	kiekyon.huang@gmail.com	Duke-NUS Graduate Medical School	8 College Road	Singapore	Select State/Province	169857	Singapore	0	Illumina NovaSeq 6000	cDNA	transcriptomic	RNA-Seq	BioSample: https://www.ncbi.nlm.nih.gov/biosample/SAMN21385769	ftp://ftp.ncbi.nlm.nih.gov/geo/samples/GSM5573nnn/GSM5573474/suppl/GSM5573474_sample9.csv.gz		GSM5573474
sample10: Primary Gastric Tissue (Tumor)	GSM5573475	Public on Oct 05 2021	Sep 10 2021	Oct 07 2021	SRA	1	Stomach	Homo sapiens	tissue: Primary Gastric Tissue (Tumor)	polyA RNA	Single cell were dissociated from gastric tissue sample using tumor dissociation kit from Miltenyi Biotec	10x Genomics Single Cell 5′ Library kit	9606	*** Raw files were not submitted due to patient privacy concerns ***	Cellranger v3.0 was used to align FASTQ sequencing reads to the hg38 reference transcriptome, generating single cell feature counts for each sample	Using Seruat version 3.0, each sample was considered for genes/features shared by 3 or more cells, and cells showing 500 or more features and less than 6000 features. Cells with mitochondrial RNA percentages of >20 were filtered out	Genome_build: hg38	Supplementary_files_format_and_content: Matrix table with raw gene counts for every gene and every cell for each sample	GPL24676	Kie Kyon,,Huang	kiekyon.huang@gmail.com	Duke-NUS Graduate Medical School	8 College Road	Singapore	Select State/Province	169857	Singapore	0	Illumina NovaSeq 6000	cDNA	transcriptomic	RNA-Seq	BioSample: https://www.ncbi.nlm.nih.gov/biosample/SAMN21385770	ftp://ftp.ncbi.nlm.nih.gov/geo/samples/GSM5573nnn/GSM5573475/suppl/GSM5573475_sample10.csv.gz		GSM5573475
sample11: Primary Gastric Tissue (Normal)	GSM5573476	Public on Oct 05 2021	Sep 10 2021	Oct 07 2021	SRA	1	Stomach	Homo sapiens	tissue: Primary Gastric Tissue (Normal)	polyA RNA	Single cell were dissociated from gastric tissue sample using tumor dissociation kit from Miltenyi Biotec	10x Genomics Single Cell 5′ Library kit	9606	*** Raw files were not submitted due to patient privacy concerns ***	Cellranger v3.0 was used to align FASTQ sequencing reads to the hg38 reference transcriptome, generating single cell feature counts for each sample	Using Seruat version 3.0, each sample was considered for genes/features shared by 3 or more cells, and cells showing 500 or more features and less than 6000 features. Cells with mitochondrial RNA percentages of >20 were filtered out	Genome_build: hg38	Supplementary_files_format_and_content: Matrix table with raw gene counts for every gene and every cell for each sample	GPL24676	Kie Kyon,,Huang	kiekyon.huang@gmail.com	Duke-NUS Graduate Medical School	8 College Road	Singapore	Select State/Province	169857	Singapore	0	Illumina NovaSeq 6000	cDNA	transcriptomic	RNA-Seq	BioSample: https://www.ncbi.nlm.nih.gov/biosample/SAMN21385771	ftp://ftp.ncbi.nlm.nih.gov/geo/samples/GSM5573nnn/GSM5573476/suppl/GSM5573476_sample11.csv.gz		GSM5573476
sample12: Primary Gastric Tissue (Tumor)	GSM5573477	Public on Oct 05 2021	Sep 10 2021	Oct 07 2021	SRA	1	Stomach	Homo sapiens	tissue: Primary Gastric Tissue (Tumor)	polyA RNA	Single cell were dissociated from gastric tissue sample using tumor dissociation kit from Miltenyi Biotec	10x Genomics Single Cell 5′ Library kit	9606	*** Raw files were not submitted due to patient privacy concerns ***	Cellranger v3.0 was used to align FASTQ sequencing reads to the hg38 reference transcriptome, generating single cell feature counts for each sample	Using Seruat version 3.0, each sample was considered for genes/features shared by 3 or more cells, and cells showing 500 or more features and less than 6000 features. Cells with mitochondrial RNA percentages of >20 were filtered out	Genome_build: hg38	Supplementary_files_format_and_content: Matrix table with raw gene counts for every gene and every cell for each sample	GPL24676	Kie Kyon,,Huang	kiekyon.huang@gmail.com	Duke-NUS Graduate Medical School	8 College Road	Singapore	Select State/Province	169857	Singapore	0	Illumina NovaSeq 6000	cDNA	transcriptomic	RNA-Seq	BioSample: https://www.ncbi.nlm.nih.gov/biosample/SAMN21385772	ftp://ftp.ncbi.nlm.nih.gov/geo/samples/GSM5573nnn/GSM5573477/suppl/GSM5573477_sample12.csv.gz		GSM5573477
sample13: Primary Gastric Tissue (Tumor)	GSM5573478	Public on Oct 05 2021	Sep 10 2021	Oct 07 2021	SRA	1	Stomach	Homo sapiens	tissue: Primary Gastric Tissue (Tumor)	polyA RNA	Single cell were dissociated from gastric tissue sample using tumor dissociation kit from Miltenyi Biotec	10x Genomics Single Cell 5′ Library kit	9606	*** Raw files were not submitted due to patient privacy concerns ***	Cellranger v3.0 was used to align FASTQ sequencing reads to the hg38 reference transcriptome, generating single cell feature counts for each sample	Using Seruat version 3.0, each sample was considered for genes/features shared by 3 or more cells, and cells showing 500 or more features and less than 6000 features. Cells with mitochondrial RNA percentages of >20 were filtered out	Genome_build: hg38	Supplementary_files_format_and_content: Matrix table with raw gene counts for every gene and every cell for each sample	GPL24676	Kie Kyon,,Huang	kiekyon.huang@gmail.com	Duke-NUS Graduate Medical School	8 College Road	Singapore	Select State/Province	169857	Singapore	0	Illumina NovaSeq 6000	cDNA	transcriptomic	RNA-Seq	BioSample: https://www.ncbi.nlm.nih.gov/biosample/SAMN21385773	ftp://ftp.ncbi.nlm.nih.gov/geo/samples/GSM5573nnn/GSM5573478/suppl/GSM5573478_sample13.csv.gz		GSM5573478
sample14: Primary Gastric Tissue (Tumor)	GSM5573479	Public on Oct 05 2021	Sep 10 2021	Oct 07 2021	SRA	1	Stomach	Homo sapiens	tissue: Primary Gastric Tissue (Tumor)	polyA RNA	Single cell were dissociated from gastric tissue sample using tumor dissociation kit from Miltenyi Biotec	10x Genomics Single Cell 5′ Library kit	9606	*** Raw files were not submitted due to patient privacy concerns ***	Cellranger v3.0 was used to align FASTQ sequencing reads to the hg38 reference transcriptome, generating single cell feature counts for each sample	Using Seruat version 3.0, each sample was considered for genes/features shared by 3 or more cells, and cells showing 500 or more features and less than 6000 features. Cells with mitochondrial RNA percentages of >20 were filtered out	Genome_build: hg38	Supplementary_files_format_and_content: Matrix table with raw gene counts for every gene and every cell for each sample	GPL24676	Kie Kyon,,Huang	kiekyon.huang@gmail.com	Duke-NUS Graduate Medical School	8 College Road	Singapore	Select State/Province	169857	Singapore	0	Illumina NovaSeq 6000	cDNA	transcriptomic	RNA-Seq	BioSample: https://www.ncbi.nlm.nih.gov/biosample/SAMN21385774	ftp://ftp.ncbi.nlm.nih.gov/geo/samples/GSM5573nnn/GSM5573479/suppl/GSM5573479_sample14.csv.gz		GSM5573479
sample15: Primary Gastric Tissue (Tumor)	GSM5573480	Public on Oct 05 2021	Sep 10 2021	Oct 07 2021	SRA	1	Stomach	Homo sapiens	tissue: Primary Gastric Tissue (Tumor)	polyA RNA	Single cell were dissociated from gastric tissue sample using tumor dissociation kit from Miltenyi Biotec	10x Genomics Single Cell 5′ Library kit	9606	*** Raw files were not submitted due to patient privacy concerns ***	Cellranger v3.0 was used to align FASTQ sequencing reads to the hg38 reference transcriptome, generating single cell feature counts for each sample	Using Seruat version 3.0, each sample was considered for genes/features shared by 3 or more cells, and cells showing 500 or more features and less than 6000 features. Cells with mitochondrial RNA percentages of >20 were filtered out	Genome_build: hg38	Supplementary_files_format_and_content: Matrix table with raw gene counts for every gene and every cell for each sample	GPL24676	Kie Kyon,,Huang	kiekyon.huang@gmail.com	Duke-NUS Graduate Medical School	8 College Road	Singapore	Select State/Province	169857	Singapore	0	Illumina NovaSeq 6000	cDNA	transcriptomic	RNA-Seq	BioSample: https://www.ncbi.nlm.nih.gov/biosample/SAMN21385775	ftp://ftp.ncbi.nlm.nih.gov/geo/samples/GSM5573nnn/GSM5573480/suppl/GSM5573480_sample15.csv.gz		GSM5573480
sample16: Primary Gastric Tissue (Tumor)	GSM5573481	Public on Oct 05 2021	Sep 10 2021	Oct 07 2021	SRA	1	Stomach	Homo sapiens	tissue: Primary Gastric Tissue (Tumor)	polyA RNA	Single cell were dissociated from gastric tissue sample using tumor dissociation kit from Miltenyi Biotec	10x Genomics Single Cell 5′ Library kit	9606	*** Raw files were not submitted due to patient privacy concerns ***	Cellranger v3.0 was used to align FASTQ sequencing reads to the hg38 reference transcriptome, generating single cell feature counts for each sample	Using Seruat version 3.0, each sample was considered for genes/features shared by 3 or more cells, and cells showing 500 or more features and less than 6000 features. Cells with mitochondrial RNA percentages of >20 were filtered out	Genome_build: hg38	Supplementary_files_format_and_content: Matrix table with raw gene counts for every gene and every cell for each sample	GPL24676	Kie Kyon,,Huang	kiekyon.huang@gmail.com	Duke-NUS Graduate Medical School	8 College Road	Singapore	Select State/Province	169857	Singapore	0	Illumina NovaSeq 6000	cDNA	transcriptomic	RNA-Seq	BioSample: https://www.ncbi.nlm.nih.gov/biosample/SAMN21385776	ftp://ftp.ncbi.nlm.nih.gov/geo/samples/GSM5573nnn/GSM5573481/suppl/GSM5573481_sample16.csv.gz		GSM5573481
sample17: Primary Gastric Tissue (Tumor)	GSM5573482	Public on Oct 05 2021	Sep 10 2021	Oct 07 2021	SRA	1	Stomach	Homo sapiens	tissue: Primary Gastric Tissue (Tumor)	polyA RNA	Single cell were dissociated from gastric tissue sample using tumor dissociation kit from Miltenyi Biotec	10x Genomics Single Cell 5′ Library kit	9606	*** Raw files were not submitted due to patient privacy concerns ***	Cellranger v3.0 was used to align FASTQ sequencing reads to the hg38 reference transcriptome, generating single cell feature counts for each sample	Using Seruat version 3.0, each sample was considered for genes/features shared by 3 or more cells, and cells showing 500 or more features and less than 6000 features. Cells with mitochondrial RNA percentages of >20 were filtered out	Genome_build: hg38	Supplementary_files_format_and_content: Matrix table with raw gene counts for every gene and every cell for each sample	GPL24676	Kie Kyon,,Huang	kiekyon.huang@gmail.com	Duke-NUS Graduate Medical School	8 College Road	Singapore	Select State/Province	169857	Singapore	0	Illumina NovaSeq 6000	cDNA	transcriptomic	RNA-Seq	BioSample: https://www.ncbi.nlm.nih.gov/biosample/SAMN21385777	ftp://ftp.ncbi.nlm.nih.gov/geo/samples/GSM5573nnn/GSM5573482/suppl/GSM5573482_sample17.csv.gz		GSM5573482
sample18: Primary Gastric Tissue (Tumor)	GSM5573483	Public on Oct 05 2021	Sep 10 2021	Oct 07 2021	SRA	1	Stomach	Homo sapiens	tissue: Primary Gastric Tissue (Tumor)	polyA RNA	Single cell were dissociated from gastric tissue sample using tumor dissociation kit from Miltenyi Biotec	10x Genomics Single Cell 5′ Library kit	9606	*** Raw files were not submitted due to patient privacy concerns ***	Cellranger v3.0 was used to align FASTQ sequencing reads to the hg38 reference transcriptome, generating single cell feature counts for each sample	Using Seruat version 3.0, each sample was considered for genes/features shared by 3 or more cells, and cells showing 500 or more features and less than 6000 features. Cells with mitochondrial RNA percentages of >20 were filtered out	Genome_build: hg38	Supplementary_files_format_and_content: Matrix table with raw gene counts for every gene and every cell for each sample	GPL24676	Kie Kyon,,Huang	kiekyon.huang@gmail.com	Duke-NUS Graduate Medical School	8 College Road	Singapore	Select State/Province	169857	Singapore	0	Illumina NovaSeq 6000	cDNA	transcriptomic	RNA-Seq	BioSample: https://www.ncbi.nlm.nih.gov/biosample/SAMN21385778	ftp://ftp.ncbi.nlm.nih.gov/geo/samples/GSM5573nnn/GSM5573483/suppl/GSM5573483_sample18.csv.gz		GSM5573483
sample19: Peritonium tissue (Tumor)	GSM5573484	Public on Oct 05 2021	Sep 10 2021	Oct 07 2021	SRA	1	peritoneum	Homo sapiens	tissue: Peritonium tissue (Tumor)	polyA RNA	Single cell were dissociated from gastric tissue sample using tumor dissociation kit from Miltenyi Biotec	10x Genomics Single Cell 5′ Library kit	9606	*** Raw files were not submitted due to patient privacy concerns ***	Cellranger v3.0 was used to align FASTQ sequencing reads to the hg38 reference transcriptome, generating single cell feature counts for each sample	Using Seruat version 3.0, each sample was considered for genes/features shared by 3 or more cells, and cells showing 500 or more features and less than 6000 features. Cells with mitochondrial RNA percentages of >20 were filtered out	Genome_build: hg38	Supplementary_files_format_and_content: Matrix table with raw gene counts for every gene and every cell for each sample	GPL24676	Kie Kyon,,Huang	kiekyon.huang@gmail.com	Duke-NUS Graduate Medical School	8 College Road	Singapore	Select State/Province	169857	Singapore	0	Illumina NovaSeq 6000	cDNA	transcriptomic	RNA-Seq	BioSample: https://www.ncbi.nlm.nih.gov/biosample/SAMN21385779	ftp://ftp.ncbi.nlm.nih.gov/geo/samples/GSM5573nnn/GSM5573484/suppl/GSM5573484_sample19.csv.gz		GSM5573484
sample20: Peritonium tissue (Tumor)	GSM5573485	Public on Oct 05 2021	Sep 10 2021	Oct 07 2021	SRA	1	peritoneum	Homo sapiens	tissue: Peritonium tissue (Tumor)	polyA RNA	Single cell were dissociated from gastric tissue sample using tumor dissociation kit from Miltenyi Biotec	10x Genomics Single Cell 5′ Library kit	9606	*** Raw files were not submitted due to patient privacy concerns ***	Cellranger v3.0 was used to align FASTQ sequencing reads to the hg38 reference transcriptome, generating single cell feature counts for each sample	Using Seruat version 3.0, each sample was considered for genes/features shared by 3 or more cells, and cells showing 500 or more features and less than 6000 features. Cells with mitochondrial RNA percentages of >20 were filtered out	Genome_build: hg38	Supplementary_files_format_and_content: Matrix table with raw gene counts for every gene and every cell for each sample	GPL24676	Kie Kyon,,Huang	kiekyon.huang@gmail.com	Duke-NUS Graduate Medical School	8 College Road	Singapore	Select State/Province	169857	Singapore	0	Illumina NovaSeq 6000	cDNA	transcriptomic	RNA-Seq	BioSample: https://www.ncbi.nlm.nih.gov/biosample/SAMN21385780	ftp://ftp.ncbi.nlm.nih.gov/geo/samples/GSM5573nnn/GSM5573485/suppl/GSM5573485_sample20.csv.gz		GSM5573485
sample21: Primary Gastric Tissue (Normal)	GSM5573486	Public on Oct 05 2021	Sep 10 2021	Oct 07 2021	SRA	1	Stomach	Homo sapiens	tissue: Primary Gastric Tissue (Normal)	polyA RNA	Single cell were dissociated from gastric tissue sample using tumor dissociation kit from Miltenyi Biotec	10x Genomics Single Cell 5′ Library kit	9606	*** Raw files were not submitted due to patient privacy concerns ***	Cellranger v3.0 was used to align FASTQ sequencing reads to the hg38 reference transcriptome, generating single cell feature counts for each sample	Using Seruat version 3.0, each sample was considered for genes/features shared by 3 or more cells, and cells showing 500 or more features and less than 6000 features. Cells with mitochondrial RNA percentages of >20 were filtered out	Genome_build: hg38	Supplementary_files_format_and_content: Matrix table with raw gene counts for every gene and every cell for each sample	GPL24676	Kie Kyon,,Huang	kiekyon.huang@gmail.com	Duke-NUS Graduate Medical School	8 College Road	Singapore	Select State/Province	169857	Singapore	0	Illumina NovaSeq 6000	cDNA	transcriptomic	RNA-Seq	BioSample: https://www.ncbi.nlm.nih.gov/biosample/SAMN21385781	ftp://ftp.ncbi.nlm.nih.gov/geo/samples/GSM5573nnn/GSM5573486/suppl/GSM5573486_sample21.csv.gz		GSM5573486
sample22: Primary Gastric Tissue (Tumor)	GSM5573487	Public on Oct 05 2021	Sep 10 2021	Oct 07 2021	SRA	1	Stomach	Homo sapiens	tissue: Primary Gastric Tissue (Tumor)	polyA RNA	Single cell were dissociated from gastric tissue sample using tumor dissociation kit from Miltenyi Biotec	10x Genomics Single Cell 5′ Library kit	9606	*** Raw files were not submitted due to patient privacy concerns ***	Cellranger v3.0 was used to align FASTQ sequencing reads to the hg38 reference transcriptome, generating single cell feature counts for each sample	Using Seruat version 3.0, each sample was considered for genes/features shared by 3 or more cells, and cells showing 500 or more features and less than 6000 features. Cells with mitochondrial RNA percentages of >20 were filtered out	Genome_build: hg38	Supplementary_files_format_and_content: Matrix table with raw gene counts for every gene and every cell for each sample	GPL24676	Kie Kyon,,Huang	kiekyon.huang@gmail.com	Duke-NUS Graduate Medical School	8 College Road	Singapore	Select State/Province	169857	Singapore	0	Illumina NovaSeq 6000	cDNA	transcriptomic	RNA-Seq	BioSample: https://www.ncbi.nlm.nih.gov/biosample/SAMN21385782	ftp://ftp.ncbi.nlm.nih.gov/geo/samples/GSM5573nnn/GSM5573487/suppl/GSM5573487_sample22.csv.gz		GSM5573487
sample23: Primary Gastric Tissue (Normal)	GSM5573488	Public on Oct 05 2021	Sep 10 2021	Oct 07 2021	SRA	1	Stomach	Homo sapiens	tissue: Primary Gastric Tissue (Normal)	polyA RNA	Single cell were dissociated from gastric tissue sample using tumor dissociation kit from Miltenyi Biotec	10x Genomics Single Cell 5′ Library kit	9606	*** Raw files were not submitted due to patient privacy concerns ***	Cellranger v3.0 was used to align FASTQ sequencing reads to the hg38 reference transcriptome, generating single cell feature counts for each sample	Using Seruat version 3.0, each sample was considered for genes/features shared by 3 or more cells, and cells showing 500 or more features and less than 6000 features. Cells with mitochondrial RNA percentages of >20 were filtered out	Genome_build: hg38	Supplementary_files_format_and_content: Matrix table with raw gene counts for every gene and every cell for each sample	GPL24676	Kie Kyon,,Huang	kiekyon.huang@gmail.com	Duke-NUS Graduate Medical School	8 College Road	Singapore	Select State/Province	169857	Singapore	0	Illumina NovaSeq 6000	cDNA	transcriptomic	RNA-Seq	BioSample: https://www.ncbi.nlm.nih.gov/biosample/SAMN21385783	ftp://ftp.ncbi.nlm.nih.gov/geo/samples/GSM5573nnn/GSM5573488/suppl/GSM5573488_sample23.csv.gz		GSM5573488
sample24: Primary Gastric Tissue (Tumor)	GSM5573489	Public on Oct 05 2021	Sep 10 2021	Oct 07 2021	SRA	1	Stomach	Homo sapiens	tissue: Primary Gastric Tissue (Tumor)	polyA RNA	Single cell were dissociated from gastric tissue sample using tumor dissociation kit from Miltenyi Biotec	10x Genomics Single Cell 5′ Library kit	9606	*** Raw files were not submitted due to patient privacy concerns ***	Cellranger v3.0 was used to align FASTQ sequencing reads to the hg38 reference transcriptome, generating single cell feature counts for each sample	Using Seruat version 3.0, each sample was considered for genes/features shared by 3 or more cells, and cells showing 500 or more features and less than 6000 features. Cells with mitochondrial RNA percentages of >20 were filtered out	Genome_build: hg38	Supplementary_files_format_and_content: Matrix table with raw gene counts for every gene and every cell for each sample	GPL24676	Kie Kyon,,Huang	kiekyon.huang@gmail.com	Duke-NUS Graduate Medical School	8 College Road	Singapore	Select State/Province	169857	Singapore	0	Illumina NovaSeq 6000	cDNA	transcriptomic	RNA-Seq	BioSample: https://www.ncbi.nlm.nih.gov/biosample/SAMN21385784	ftp://ftp.ncbi.nlm.nih.gov/geo/samples/GSM5573nnn/GSM5573489/suppl/GSM5573489_sample24.csv.gz		GSM5573489
sample25: Primary Gastric Tissue (Normal)	GSM5573490	Public on Oct 05 2021	Sep 10 2021	Oct 07 2021	SRA	1	Stomach	Homo sapiens	tissue: Primary Gastric Tissue (Normal)	polyA RNA	Single cell were dissociated from gastric tissue sample using tumor dissociation kit from Miltenyi Biotec	10x Genomics Single Cell 5′ Library kit	9606	*** Raw files were not submitted due to patient privacy concerns ***	Cellranger v3.0 was used to align FASTQ sequencing reads to the hg38 reference transcriptome, generating single cell feature counts for each sample	Using Seruat version 3.0, each sample was considered for genes/features shared by 3 or more cells, and cells showing 500 or more features and less than 6000 features. Cells with mitochondrial RNA percentages of >20 were filtered out	Genome_build: hg38	Supplementary_files_format_and_content: Matrix table with raw gene counts for every gene and every cell for each sample	GPL24676	Kie Kyon,,Huang	kiekyon.huang@gmail.com	Duke-NUS Graduate Medical School	8 College Road	Singapore	Select State/Province	169857	Singapore	0	Illumina NovaSeq 6000	cDNA	transcriptomic	RNA-Seq	BioSample: https://www.ncbi.nlm.nih.gov/biosample/SAMN21385785	ftp://ftp.ncbi.nlm.nih.gov/geo/samples/GSM5573nnn/GSM5573490/suppl/GSM5573490_sample25.csv.gz		GSM5573490
sample26: Primary Gastric Tissue (Tumor)	GSM5573491	Public on Oct 05 2021	Sep 10 2021	Oct 07 2021	SRA	1	Stomach	Homo sapiens	tissue: Primary Gastric Tissue (Tumor)	polyA RNA	Single cell were dissociated from gastric tissue sample using tumor dissociation kit from Miltenyi Biotec	10x Genomics Single Cell 5′ Library kit	9606	*** Raw files were not submitted due to patient privacy concerns ***	Cellranger v3.0 was used to align FASTQ sequencing reads to the hg38 reference transcriptome, generating single cell feature counts for each sample	Using Seruat version 3.0, each sample was considered for genes/features shared by 3 or more cells, and cells showing 500 or more features and less than 6000 features. Cells with mitochondrial RNA percentages of >20 were filtered out	Genome_build: hg38	Supplementary_files_format_and_content: Matrix table with raw gene counts for every gene and every cell for each sample	GPL24676	Kie Kyon,,Huang	kiekyon.huang@gmail.com	Duke-NUS Graduate Medical School	8 College Road	Singapore	Select State/Province	169857	Singapore	0	Illumina NovaSeq 6000	cDNA	transcriptomic	RNA-Seq	BioSample: https://www.ncbi.nlm.nih.gov/biosample/SAMN21385786	ftp://ftp.ncbi.nlm.nih.gov/geo/samples/GSM5573nnn/GSM5573491/suppl/GSM5573491_sample26.csv.gz		GSM5573491
sample27: Primary Gastric Tissue (Tumor)	GSM5573492	Public on Oct 05 2021	Sep 10 2021	Oct 07 2021	SRA	1	Stomach	Homo sapiens	tissue: Primary Gastric Tissue (Tumor)	polyA RNA	Single cell were dissociated from gastric tissue sample using tumor dissociation kit from Miltenyi Biotec	10x Genomics Single Cell 5′ Library kit	9606	*** Raw files were not submitted due to patient privacy concerns ***	Cellranger v3.0 was used to align FASTQ sequencing reads to the hg38 reference transcriptome, generating single cell feature counts for each sample	Using Seruat version 3.0, each sample was considered for genes/features shared by 3 or more cells, and cells showing 500 or more features and less than 6000 features. Cells with mitochondrial RNA percentages of >20 were filtered out	Genome_build: hg38	Supplementary_files_format_and_content: Matrix table with raw gene counts for every gene and every cell for each sample	GPL24676	Kie Kyon,,Huang	kiekyon.huang@gmail.com	Duke-NUS Graduate Medical School	8 College Road	Singapore	Select State/Province	169857	Singapore	0	Illumina NovaSeq 6000	cDNA	transcriptomic	RNA-Seq	BioSample: https://www.ncbi.nlm.nih.gov/biosample/SAMN21385787	ftp://ftp.ncbi.nlm.nih.gov/geo/samples/GSM5573nnn/GSM5573492/suppl/GSM5573492_sample27.csv.gz		GSM5573492
sample28: Primary Gastric Tissue (Tumor)	GSM5573493	Public on Oct 05 2021	Sep 10 2021	Oct 07 2021	SRA	1	Stomach	Homo sapiens	tissue: Primary Gastric Tissue (Tumor)	polyA RNA	Single cell were dissociated from gastric tissue sample using tumor dissociation kit from Miltenyi Biotec	10x Genomics Single Cell 5′ Library kit	9606	*** Raw files were not submitted due to patient privacy concerns ***	Cellranger v3.0 was used to align FASTQ sequencing reads to the hg38 reference transcriptome, generating single cell feature counts for each sample	Using Seruat version 3.0, each sample was considered for genes/features shared by 3 or more cells, and cells showing 500 or more features and less than 6000 features. Cells with mitochondrial RNA percentages of >20 were filtered out	Genome_build: hg38	Supplementary_files_format_and_content: Matrix table with raw gene counts for every gene and every cell for each sample	GPL24676	Kie Kyon,,Huang	kiekyon.huang@gmail.com	Duke-NUS Graduate Medical School	8 College Road	Singapore	Select State/Province	169857	Singapore	0	Illumina NovaSeq 6000	cDNA	transcriptomic	RNA-Seq	BioSample: https://www.ncbi.nlm.nih.gov/biosample/SAMN21385788	ftp://ftp.ncbi.nlm.nih.gov/geo/samples/GSM5573nnn/GSM5573493/suppl/GSM5573493_sample28.csv.gz		GSM5573493
sample29: Primary Gastric Tissue (Tumor)	GSM5573494	Public on Oct 05 2021	Sep 10 2021	Oct 07 2021	SRA	1	Stomach	Homo sapiens	tissue: Primary Gastric Tissue (Tumor)	polyA RNA	Single cell were dissociated from gastric tissue sample using tumor dissociation kit from Miltenyi Biotec	10x Genomics Single Cell 5′ Library kit	9606	*** Raw files were not submitted due to patient privacy concerns ***	Cellranger v3.0 was used to align FASTQ sequencing reads to the hg38 reference transcriptome, generating single cell feature counts for each sample	Using Seruat version 3.0, each sample was considered for genes/features shared by 3 or more cells, and cells showing 500 or more features and less than 6000 features. Cells with mitochondrial RNA percentages of >20 were filtered out	Genome_build: hg38	Supplementary_files_format_and_content: Matrix table with raw gene counts for every gene and every cell for each sample	GPL24676	Kie Kyon,,Huang	kiekyon.huang@gmail.com	Duke-NUS Graduate Medical School	8 College Road	Singapore	Select State/Province	169857	Singapore	0	Illumina NovaSeq 6000	cDNA	transcriptomic	RNA-Seq	BioSample: https://www.ncbi.nlm.nih.gov/biosample/SAMN21385789	ftp://ftp.ncbi.nlm.nih.gov/geo/samples/GSM5573nnn/GSM5573494/suppl/GSM5573494_sample29.csv.gz		GSM5573494
sample30: Primary Gastric Tissue (Tumor)	GSM5573495	Public on Oct 05 2021	Sep 10 2021	Oct 07 2021	SRA	1	Stomach	Homo sapiens	tissue: Primary Gastric Tissue (Tumor)	polyA RNA	Single cell were dissociated from gastric tissue sample using tumor dissociation kit from Miltenyi Biotec	10x Genomics Single Cell 5′ Library kit	9606	*** Raw files were not submitted due to patient privacy concerns ***	Cellranger v3.0 was used to align FASTQ sequencing reads to the hg38 reference transcriptome, generating single cell feature counts for each sample	Using Seruat version 3.0, each sample was considered for genes/features shared by 3 or more cells, and cells showing 500 or more features and less than 6000 features. Cells with mitochondrial RNA percentages of >20 were filtered out	Genome_build: hg38	Supplementary_files_format_and_content: Matrix table with raw gene counts for every gene and every cell for each sample	GPL24676	Kie Kyon,,Huang	kiekyon.huang@gmail.com	Duke-NUS Graduate Medical School	8 College Road	Singapore	Select State/Province	169857	Singapore	0	Illumina NovaSeq 6000	cDNA	transcriptomic	RNA-Seq	BioSample: https://www.ncbi.nlm.nih.gov/biosample/SAMN21385790	ftp://ftp.ncbi.nlm.nih.gov/geo/samples/GSM5573nnn/GSM5573495/suppl/GSM5573495_sample30.csv.gz		GSM5573495
sample31: Primary Gastric Tissue (Normal)	GSM5573496	Public on Oct 05 2021	Sep 10 2021	Oct 07 2021	SRA	1	Stomach	Homo sapiens	tissue: Primary Gastric Tissue (Normal)	polyA RNA	Single cell were dissociated from gastric tissue sample using tumor dissociation kit from Miltenyi Biotec	10x Genomics Single Cell 5′ Library kit	9606	*** Raw files were not submitted due to patient privacy concerns ***	Cellranger v3.0 was used to align FASTQ sequencing reads to the hg38 reference transcriptome, generating single cell feature counts for each sample	Using Seruat version 3.0, each sample was considered for genes/features shared by 3 or more cells, and cells showing 500 or more features and less than 6000 features. Cells with mitochondrial RNA percentages of >20 were filtered out	Genome_build: hg38	Supplementary_files_format_and_content: Matrix table with raw gene counts for every gene and every cell for each sample	GPL24676	Kie Kyon,,Huang	kiekyon.huang@gmail.com	Duke-NUS Graduate Medical School	8 College Road	Singapore	Select State/Province	169857	Singapore	0	Illumina NovaSeq 6000	cDNA	transcriptomic	RNA-Seq	BioSample: https://www.ncbi.nlm.nih.gov/biosample/SAMN21385791	ftp://ftp.ncbi.nlm.nih.gov/geo/samples/GSM5573nnn/GSM5573496/suppl/GSM5573496_sample31.csv.gz		GSM5573496
sample32: Primary Gastric Tissue (Tumor)	GSM5573497	Public on Oct 05 2021	Sep 10 2021	Oct 07 2021	SRA	1	Stomach	Homo sapiens	tissue: Primary Gastric Tissue (Tumor)	polyA RNA	Single cell were dissociated from gastric tissue sample using tumor dissociation kit from Miltenyi Biotec	10x Genomics Single Cell 5′ Library kit	9606	*** Raw files were not submitted due to patient privacy concerns ***	Cellranger v3.0 was used to align FASTQ sequencing reads to the hg38 reference transcriptome, generating single cell feature counts for each sample	Using Seruat version 3.0, each sample was considered for genes/features shared by 3 or more cells, and cells showing 500 or more features and less than 6000 features. Cells with mitochondrial RNA percentages of >20 were filtered out	Genome_build: hg38	Supplementary_files_format_and_content: Matrix table with raw gene counts for every gene and every cell for each sample	GPL24676	Kie Kyon,,Huang	kiekyon.huang@gmail.com	Duke-NUS Graduate Medical School	8 College Road	Singapore	Select State/Province	169857	Singapore	0	Illumina NovaSeq 6000	cDNA	transcriptomic	RNA-Seq	BioSample: https://www.ncbi.nlm.nih.gov/biosample/SAMN21385792	ftp://ftp.ncbi.nlm.nih.gov/geo/samples/GSM5573nnn/GSM5573497/suppl/GSM5573497_sample32.csv.gz		GSM5573497
sample33: Primary Gastric Tissue (Tumor)	GSM5573498	Public on Oct 05 2021	Sep 10 2021	Oct 07 2021	SRA	1	Stomach	Homo sapiens	tissue: Primary Gastric Tissue (Tumor)	polyA RNA	Single cell were dissociated from gastric tissue sample using tumor dissociation kit from Miltenyi Biotec	10x Genomics Single Cell 5′ Library kit	9606	*** Raw files were not submitted due to patient privacy concerns ***	Cellranger v3.0 was used to align FASTQ sequencing reads to the hg38 reference transcriptome, generating single cell feature counts for each sample	Using Seruat version 3.0, each sample was considered for genes/features shared by 3 or more cells, and cells showing 500 or more features and less than 6000 features. Cells with mitochondrial RNA percentages of >20 were filtered out	Genome_build: hg38	Supplementary_files_format_and_content: Matrix table with raw gene counts for every gene and every cell for each sample	GPL24676	Kie Kyon,,Huang	kiekyon.huang@gmail.com	Duke-NUS Graduate Medical School	8 College Road	Singapore	Select State/Province	169857	Singapore	0	Illumina NovaSeq 6000	cDNA	transcriptomic	RNA-Seq	BioSample: https://www.ncbi.nlm.nih.gov/biosample/SAMN21385793	ftp://ftp.ncbi.nlm.nih.gov/geo/samples/GSM5573nnn/GSM5573498/suppl/GSM5573498_sample33.csv.gz		GSM5573498
sample34: Primary Gastric Tissue (Tumor)	GSM5573499	Public on Oct 05 2021	Sep 10 2021	Oct 07 2021	SRA	1	Stomach	Homo sapiens	tissue: Primary Gastric Tissue (Tumor)	polyA RNA	Single cell were dissociated from gastric tissue sample using tumor dissociation kit from Miltenyi Biotec	10x Genomics Single Cell 5′ Library kit	9606	*** Raw files were not submitted due to patient privacy concerns ***	Cellranger v3.0 was used to align FASTQ sequencing reads to the hg38 reference transcriptome, generating single cell feature counts for each sample	Using Seruat version 3.0, each sample was considered for genes/features shared by 3 or more cells, and cells showing 500 or more features and less than 6000 features. Cells with mitochondrial RNA percentages of >20 were filtered out	Genome_build: hg38	Supplementary_files_format_and_content: Matrix table with raw gene counts for every gene and every cell for each sample	GPL24676	Kie Kyon,,Huang	kiekyon.huang@gmail.com	Duke-NUS Graduate Medical School	8 College Road	Singapore	Select State/Province	169857	Singapore	0	Illumina NovaSeq 6000	cDNA	transcriptomic	RNA-Seq	BioSample: https://www.ncbi.nlm.nih.gov/biosample/SAMN21385794	ftp://ftp.ncbi.nlm.nih.gov/geo/samples/GSM5573nnn/GSM5573499/suppl/GSM5573499_sample34.csv.gz		GSM5573499
sample35: Primary Gastric Tissue (Normal)	GSM5573500	Public on Oct 05 2021	Sep 10 2021	Oct 07 2021	SRA	1	Stomach	Homo sapiens	tissue: Primary Gastric Tissue (Normal)	polyA RNA	Single cell were dissociated from gastric tissue sample using tumor dissociation kit from Miltenyi Biotec	10x Genomics Single Cell 5′ Library kit	9606	*** Raw files were not submitted due to patient privacy concerns ***	Cellranger v3.0 was used to align FASTQ sequencing reads to the hg38 reference transcriptome, generating single cell feature counts for each sample	Using Seruat version 3.0, each sample was considered for genes/features shared by 3 or more cells, and cells showing 500 or more features and less than 6000 features. Cells with mitochondrial RNA percentages of >20 were filtered out	Genome_build: hg38	Supplementary_files_format_and_content: Matrix table with raw gene counts for every gene and every cell for each sample	GPL24676	Kie Kyon,,Huang	kiekyon.huang@gmail.com	Duke-NUS Graduate Medical School	8 College Road	Singapore	Select State/Province	169857	Singapore	0	Illumina NovaSeq 6000	cDNA	transcriptomic	RNA-Seq	BioSample: https://www.ncbi.nlm.nih.gov/biosample/SAMN21385795	ftp://ftp.ncbi.nlm.nih.gov/geo/samples/GSM5573nnn/GSM5573500/suppl/GSM5573500_sample35.csv.gz		GSM5573500
sample36: Primary Gastric Tissue (Tumor)	GSM5573501	Public on Oct 05 2021	Sep 10 2021	Oct 07 2021	SRA	1	Stomach	Homo sapiens	tissue: Primary Gastric Tissue (Tumor)	polyA RNA	Single cell were dissociated from gastric tissue sample using tumor dissociation kit from Miltenyi Biotec	10x Genomics Single Cell 5′ Library kit	9606	*** Raw files were not submitted due to patient privacy concerns ***	Cellranger v3.0 was used to align FASTQ sequencing reads to the hg38 reference transcriptome, generating single cell feature counts for each sample	Using Seruat version 3.0, each sample was considered for genes/features shared by 3 or more cells, and cells showing 500 or more features and less than 6000 features. Cells with mitochondrial RNA percentages of >20 were filtered out	Genome_build: hg38	Supplementary_files_format_and_content: Matrix table with raw gene counts for every gene and every cell for each sample	GPL24676	Kie Kyon,,Huang	kiekyon.huang@gmail.com	Duke-NUS Graduate Medical School	8 College Road	Singapore	Select State/Province	169857	Singapore	0	Illumina NovaSeq 6000	cDNA	transcriptomic	RNA-Seq	BioSample: https://www.ncbi.nlm.nih.gov/biosample/SAMN21385798	ftp://ftp.ncbi.nlm.nih.gov/geo/samples/GSM5573nnn/GSM5573501/suppl/GSM5573501_sample36.csv.gz		GSM5573501
sample37: Peritonium tissue (Normal)	GSM5573502	Public on Oct 05 2021	Sep 10 2021	Oct 07 2021	SRA	1	peritoneum	Homo sapiens	tissue: Peritonium tissue (Normal)	polyA RNA	Single cell were dissociated from gastric tissue sample using tumor dissociation kit from Miltenyi Biotec	10x Genomics Single Cell 5′ Library kit	9606	*** Raw files were not submitted due to patient privacy concerns ***	Cellranger v3.0 was used to align FASTQ sequencing reads to the hg38 reference transcriptome, generating single cell feature counts for each sample	Using Seruat version 3.0, each sample was considered for genes/features shared by 3 or more cells, and cells showing 500 or more features and less than 6000 features. Cells with mitochondrial RNA percentages of >20 were filtered out	Genome_build: hg38	Supplementary_files_format_and_content: Matrix table with raw gene counts for every gene and every cell for each sample	GPL24676	Kie Kyon,,Huang	kiekyon.huang@gmail.com	Duke-NUS Graduate Medical School	8 College Road	Singapore	Select State/Province	169857	Singapore	0	Illumina NovaSeq 6000	cDNA	transcriptomic	RNA-Seq	BioSample: https://www.ncbi.nlm.nih.gov/biosample/SAMN21385747	ftp://ftp.ncbi.nlm.nih.gov/geo/samples/GSM5573nnn/GSM5573502/suppl/GSM5573502_sample37.csv.gz		GSM5573502
sample38: Peritonium tissue (Tumor)	GSM5573503	Public on Oct 05 2021	Sep 10 2021	Oct 07 2021	SRA	1	peritoneum	Homo sapiens	tissue: Peritonium tissue (Tumor)	polyA RNA	Single cell were dissociated from gastric tissue sample using tumor dissociation kit from Miltenyi Biotec	10x Genomics Single Cell 5′ Library kit	9606	*** Raw files were not submitted due to patient privacy concerns ***	Cellranger v3.0 was used to align FASTQ sequencing reads to the hg38 reference transcriptome, generating single cell feature counts for each sample	Using Seruat version 3.0, each sample was considered for genes/features shared by 3 or more cells, and cells showing 500 or more features and less than 6000 features. Cells with mitochondrial RNA percentages of >20 were filtered out	Genome_build: hg38	Supplementary_files_format_and_content: Matrix table with raw gene counts for every gene and every cell for each sample	GPL24676	Kie Kyon,,Huang	kiekyon.huang@gmail.com	Duke-NUS Graduate Medical School	8 College Road	Singapore	Select State/Province	169857	Singapore	0	Illumina NovaSeq 6000	cDNA	transcriptomic	RNA-Seq	BioSample: https://www.ncbi.nlm.nih.gov/biosample/SAMN21385749	ftp://ftp.ncbi.nlm.nih.gov/geo/samples/GSM5573nnn/GSM5573503/suppl/GSM5573503_sample38.csv.gz		GSM5573503
sample39: Primary Gastric Tissue (Tumor)	GSM5573504	Public on Oct 05 2021	Sep 10 2021	Oct 07 2021	SRA	1	Stomach	Homo sapiens	tissue: Primary Gastric Tissue (Tumor)	polyA RNA	Single cell were dissociated from gastric tissue sample using tumor dissociation kit from Miltenyi Biotec	10x Genomics Single Cell 5′ Library kit	9606	*** Raw files were not submitted due to patient privacy concerns ***	Cellranger v3.0 was used to align FASTQ sequencing reads to the hg38 reference transcriptome, generating single cell feature counts for each sample	Using Seruat version 3.0, each sample was considered for genes/features shared by 3 or more cells, and cells showing 500 or more features and less than 6000 features. Cells with mitochondrial RNA percentages of >20 were filtered out	Genome_build: hg38	Supplementary_files_format_and_content: Matrix table with raw gene counts for every gene and every cell for each sample	GPL24676	Kie Kyon,,Huang	kiekyon.huang@gmail.com	Duke-NUS Graduate Medical School	8 College Road	Singapore	Select State/Province	169857	Singapore	0	Illumina NovaSeq 6000	cDNA	transcriptomic	RNA-Seq	BioSample: https://www.ncbi.nlm.nih.gov/biosample/SAMN21385796	ftp://ftp.ncbi.nlm.nih.gov/geo/samples/GSM5573nnn/GSM5573504/suppl/GSM5573504_sample39.csv.gz		GSM5573504
sample40: Primary Gastric Tissue (Tumor)	GSM5573505	Public on Oct 05 2021	Sep 10 2021	Oct 07 2021	SRA	1	Stomach	Homo sapiens	tissue: Primary Gastric Tissue (Tumor)	polyA RNA	Single cell were dissociated from gastric tissue sample using tumor dissociation kit from Miltenyi Biotec	10x Genomics Single Cell 5′ Library kit	9606	*** Raw files were not submitted due to patient privacy concerns ***	Cellranger v3.0 was used to align FASTQ sequencing reads to the hg38 reference transcriptome, generating single cell feature counts for each sample	Using Seruat version 3.0, each sample was considered for genes/features shared by 3 or more cells, and cells showing 500 or more features and less than 6000 features. Cells with mitochondrial RNA percentages of >20 were filtered out	Genome_build: hg38	Supplementary_files_format_and_content: Matrix table with raw gene counts for every gene and every cell for each sample	GPL24676	Kie Kyon,,Huang	kiekyon.huang@gmail.com	Duke-NUS Graduate Medical School	8 College Road	Singapore	Select State/Province	169857	Singapore	0	Illumina NovaSeq 6000	cDNA	transcriptomic	RNA-Seq	BioSample: https://www.ncbi.nlm.nih.gov/biosample/SAMN21385797	ftp://ftp.ncbi.nlm.nih.gov/geo/samples/GSM5573nnn/GSM5573505/suppl/GSM5573505_sample40.csv.gz		GSM5573505

## Sheet: Sheet3
!Sample_title	!Sample_geo_accession	!Sample_source_name_ch1	!Sample_characteristics_ch1	!Sample_molecule_ch1	!Sample_data_processing	!Sample_relation	!Sample_supplementary_file_1	!series_matrix_table_begin	ID_REF	!series_matrix_table_end
sample1: Primary Gastric Tissue (Normal)	GSM5573466	Stomach	tissue: Primary Gastric Tissue (Normal)	polyA RNA	Cellranger v3.0 was used to align FASTQ sequencing reads to the hg38 reference transcriptome, generating single cell feature counts for each sample	BioSample: https://www.ncbi.nlm.nih.gov/biosample/SAMN21385761	ftp://ftp.ncbi.nlm.nih.gov/geo/samples/GSM5573nnn/GSM5573466/suppl/GSM5573466_sample1.csv.gz		GSM5573466
sample2: Primary Gastric Tissue (Tumor)	GSM5573467	Stomach	tissue: Primary Gastric Tissue (Tumor)	polyA RNA	Cellranger v3.0 was used to align FASTQ sequencing reads to the hg38 reference transcriptome, generating single cell feature counts for each sample	BioSample: https://www.ncbi.nlm.nih.gov/biosample/SAMN21385762	ftp://ftp.ncbi.nlm.nih.gov/geo/samples/GSM5573nnn/GSM5573467/suppl/GSM5573467_sample2.csv.gz		GSM5573467
sample3: Primary Gastric Tissue (Tumor)	GSM5573468	Stomach	tissue: Primary Gastric Tissue (Tumor)	polyA RNA	Cellranger v3.0 was used to align FASTQ sequencing reads to the hg38 reference transcriptome, generating single cell feature counts for each sample	BioSample: https://www.ncbi.nlm.nih.gov/biosample/SAMN21385763	ftp://ftp.ncbi.nlm.nih.gov/geo/samples/GSM5573nnn/GSM5573468/suppl/GSM5573468_sample3.csv.gz		GSM5573468
sample4: Primary Gastric Tissue (Normal)	GSM5573469	Stomach	tissue: Primary Gastric Tissue (Normal)	polyA RNA	Cellranger v3.0 was used to align FASTQ sequencing reads to the hg38 reference transcriptome, generating single cell feature counts for each sample	BioSample: https://www.ncbi.nlm.nih.gov/biosample/SAMN21385764	ftp://ftp.ncbi.nlm.nih.gov/geo/samples/GSM5573nnn/GSM5573469/suppl/GSM5573469_sample4.csv.gz		GSM5573469
sample5: Primary Gastric Tissue (Tumor)	GSM5573470	Stomach	tissue: Primary Gastric Tissue (Tumor)	polyA RNA	Cellranger v3.0 was used to align FASTQ sequencing reads to the hg38 reference transcriptome, generating single cell feature counts for each sample	BioSample: https://www.ncbi.nlm.nih.gov/biosample/SAMN21385765	ftp://ftp.ncbi.nlm.nih.gov/geo/samples/GSM5573nnn/GSM5573470/suppl/GSM5573470_sample5.csv.gz		GSM5573470
sample6: Primary Gastric Tissue (Normal)	GSM5573471	Stomach	tissue: Primary Gastric Tissue (Normal)	polyA RNA	Cellranger v3.0 was used to align FASTQ sequencing reads to the hg38 reference transcriptome, generating single cell feature counts for each sample	BioSample: https://www.ncbi.nlm.nih.gov/biosample/SAMN21385768	ftp://ftp.ncbi.nlm.nih.gov/geo/samples/GSM5573nnn/GSM5573471/suppl/GSM5573471_sample6.csv.gz		GSM5573471
sample7: Primary Gastric Tissue (Tumor)	GSM5573472	Stomach	tissue: Primary Gastric Tissue (Tumor)	polyA RNA	Cellranger v3.0 was used to align FASTQ sequencing reads to the hg38 reference transcriptome, generating single cell feature counts for each sample	BioSample: https://www.ncbi.nlm.nih.gov/biosample/SAMN21385766	ftp://ftp.ncbi.nlm.nih.gov/geo/samples/GSM5573nnn/GSM5573472/suppl/GSM5573472_sample7.csv.gz		GSM5573472
sample8: Primary Gastric Tissue (Tumor)	GSM5573473	Stomach	tissue: Primary Gastric Tissue (Tumor)	polyA RNA	Cellranger v3.0 was used to align FASTQ sequencing reads to the hg38 reference transcriptome, generating single cell feature counts for each sample	BioSample: https://www.ncbi.nlm.nih.gov/biosample/SAMN21385767	ftp://ftp.ncbi.nlm.nih.gov/geo/samples/GSM5573nnn/GSM5573473/suppl/GSM5573473_sample8.csv.gz		GSM5573473
sample9: Primary Gastric Tissue (Normal)	GSM5573474	Stomach	tissue: Primary Gastric Tissue (Normal)	polyA RNA	Cellranger v3.0 was used to align FASTQ sequencing reads to the hg38 reference transcriptome, generating single cell feature counts for each sample	BioSample: https://www.ncbi.nlm.nih.gov/biosample/SAMN21385769	ftp://ftp.ncbi.nlm.nih.gov/geo/samples/GSM5573nnn/GSM5573474/suppl/GSM5573474_sample9.csv.gz		GSM5573474
sample10: Primary Gastric Tissue (Tumor)	GSM5573475	Stomach	tissue: Primary Gastric Tissue (Tumor)	polyA RNA	Cellranger v3.0 was used to align FASTQ sequencing reads to the hg38 reference transcriptome, generating single cell feature counts for each sample	BioSample: https://www.ncbi.nlm.nih.gov/biosample/SAMN21385770	ftp://ftp.ncbi.nlm.nih.gov/geo/samples/GSM5573nnn/GSM5573475/suppl/GSM5573475_sample10.csv.gz		GSM5573475
sample11: Primary Gastric Tissue (Normal)	GSM5573476	Stomach	tissue: Primary Gastric Tissue (Normal)	polyA RNA	Cellranger v3.0 was used to align FASTQ sequencing reads to the hg38 reference transcriptome, generating single cell feature counts for each sample	BioSample: https://www.ncbi.nlm.nih.gov/biosample/SAMN21385771	ftp://ftp.ncbi.nlm.nih.gov/geo/samples/GSM5573nnn/GSM5573476/suppl/GSM5573476_sample11.csv.gz		GSM5573476
sample12: Primary Gastric Tissue (Tumor)	GSM5573477	Stomach	tissue: Primary Gastric Tissue (Tumor)	polyA RNA	Cellranger v3.0 was used to align FASTQ sequencing reads to the hg38 reference transcriptome, generating single cell feature counts for each sample	BioSample: https://www.ncbi.nlm.nih.gov/biosample/SAMN21385772	ftp://ftp.ncbi.nlm.nih.gov/geo/samples/GSM5573nnn/GSM5573477/suppl/GSM5573477_sample12.csv.gz		GSM5573477
sample13: Primary Gastric Tissue (Tumor)	GSM5573478	Stomach	tissue: Primary Gastric Tissue (Tumor)	polyA RNA	Cellranger v3.0 was used to align FASTQ sequencing reads to the hg38 reference transcriptome, generating single cell feature counts for each sample	BioSample: https://www.ncbi.nlm.nih.gov/biosample/SAMN21385773	ftp://ftp.ncbi.nlm.nih.gov/geo/samples/GSM5573nnn/GSM5573478/suppl/GSM5573478_sample13.csv.gz		GSM5573478
sample14: Primary Gastric Tissue (Tumor)	GSM5573479	Stomach	tissue: Primary Gastric Tissue (Tumor)	polyA RNA	Cellranger v3.0 was used to align FASTQ sequencing reads to the hg38 reference transcriptome, generating single cell feature counts for each sample	BioSample: https://www.ncbi.nlm.nih.gov/biosample/SAMN21385774	ftp://ftp.ncbi.nlm.nih.gov/geo/samples/GSM5573nnn/GSM5573479/suppl/GSM5573479_sample14.csv.gz		GSM5573479
sample15: Primary Gastric Tissue (Tumor)	GSM5573480	Stomach	tissue: Primary Gastric Tissue (Tumor)	polyA RNA	Cellranger v3.0 was used to align FASTQ sequencing reads to the hg38 reference transcriptome, generating single cell feature counts for each sample	BioSample: https://www.ncbi.nlm.nih.gov/biosample/SAMN21385775	ftp://ftp.ncbi.nlm.nih.gov/geo/samples/GSM5573nnn/GSM5573480/suppl/GSM5573480_sample15.csv.gz		GSM5573480
sample16: Primary Gastric Tissue (Tumor)	GSM5573481	Stomach	tissue: Primary Gastric Tissue (Tumor)	polyA RNA	Cellranger v3.0 was used to align FASTQ sequencing reads to the hg38 reference transcriptome, generating single cell feature counts for each sample	BioSample: https://www.ncbi.nlm.nih.gov/biosample/SAMN21385776	ftp://ftp.ncbi.nlm.nih.gov/geo/samples/GSM5573nnn/GSM5573481/suppl/GSM5573481_sample16.csv.gz		GSM5573481
sample17: Primary Gastric Tissue (Tumor)	GSM5573482	Stomach	tissue: Primary Gastric Tissue (Tumor)	polyA RNA	Cellranger v3.0 was used to align FASTQ sequencing reads to the hg38 reference transcriptome, generating single cell feature counts for each sample	BioSample: https://www.ncbi.nlm.nih.gov/biosample/SAMN21385777	ftp://ftp.ncbi.nlm.nih.gov/geo/samples/GSM5573nnn/GSM5573482/suppl/GSM5573482_sample17.csv.gz		GSM5573482
sample18: Primary Gastric Tissue (Tumor)	GSM5573483	Stomach	tissue: Primary Gastric Tissue (Tumor)	polyA RNA	Cellranger v3.0 was used to align FASTQ sequencing reads to the hg38 reference transcriptome, generating single cell feature counts for each sample	BioSample: https://www.ncbi.nlm.nih.gov/biosample/SAMN21385778	ftp://ftp.ncbi.nlm.nih.gov/geo/samples/GSM5573nnn/GSM5573483/suppl/GSM5573483_sample18.csv.gz		GSM5573483
sample19: Peritonium tissue (Tumor)	GSM5573484	peritoneum	tissue: Peritonium tissue (Tumor)	polyA RNA	Cellranger v3.0 was used to align FASTQ sequencing reads to the hg38 reference transcriptome, generating single cell feature counts for each sample	BioSample: https://www.ncbi.nlm.nih.gov/biosample/SAMN21385779	ftp://ftp.ncbi.nlm.nih.gov/geo/samples/GSM5573nnn/GSM5573484/suppl/GSM5573484_sample19.csv.gz		GSM5573484
sample20: Peritonium tissue (Tumor)	GSM5573485	peritoneum	tissue: Peritonium tissue (Tumor)	polyA RNA	Cellranger v3.0 was used to align FASTQ sequencing reads to the hg38 reference transcriptome, generating single cell feature counts for each sample	BioSample: https://www.ncbi.nlm.nih.gov/biosample/SAMN21385780	ftp://ftp.ncbi.nlm.nih.gov/geo/samples/GSM5573nnn/GSM5573485/suppl/GSM5573485_sample20.csv.gz		GSM5573485
sample21: Primary Gastric Tissue (Normal)	GSM5573486	Stomach	tissue: Primary Gastric Tissue (Normal)	polyA RNA	Cellranger v3.0 was used to align FASTQ sequencing reads to the hg38 reference transcriptome, generating single cell feature counts for each sample	BioSample: https://www.ncbi.nlm.nih.gov/biosample/SAMN21385781	ftp://ftp.ncbi.nlm.nih.gov/geo/samples/GSM5573nnn/GSM5573486/suppl/GSM5573486_sample21.csv.gz		GSM5573486
sample22: Primary Gastric Tissue (Tumor)	GSM5573487	Stomach	tissue: Primary Gastric Tissue (Tumor)	polyA RNA	Cellranger v3.0 was used to align FASTQ sequencing reads to the hg38 reference transcriptome, generating single cell feature counts for each sample	BioSample: https://www.ncbi.nlm.nih.gov/biosample/SAMN21385782	ftp://ftp.ncbi.nlm.nih.gov/geo/samples/GSM5573nnn/GSM5573487/suppl/GSM5573487_sample22.csv.gz		GSM5573487
sample23: Primary Gastric Tissue (Normal)	GSM5573488	Stomach	tissue: Primary Gastric Tissue (Normal)	polyA RNA	Cellranger v3.0 was used to align FASTQ sequencing reads to the hg38 reference transcriptome, generating single cell feature counts for each sample	BioSample: https://www.ncbi.nlm.nih.gov/biosample/SAMN21385783	ftp://ftp.ncbi.nlm.nih.gov/geo/samples/GSM5573nnn/GSM5573488/suppl/GSM5573488_sample23.csv.gz		GSM5573488
sample24: Primary Gastric Tissue (Tumor)	GSM5573489	Stomach	tissue: Primary Gastric Tissue (Tumor)	polyA RNA	Cellranger v3.0 was used to align FASTQ sequencing reads to the hg38 reference transcriptome, generating single cell feature counts for each sample	BioSample: https://www.ncbi.nlm.nih.gov/biosample/SAMN21385784	ftp://ftp.ncbi.nlm.nih.gov/geo/samples/GSM5573nnn/GSM5573489/suppl/GSM5573489_sample24.csv.gz		GSM5573489
sample25: Primary Gastric Tissue (Normal)	GSM5573490	Stomach	tissue: Primary Gastric Tissue (Normal)	polyA RNA	Cellranger v3.0 was used to align FASTQ sequencing reads to the hg38 reference transcriptome, generating single cell feature counts for each sample	BioSample: https://www.ncbi.nlm.nih.gov/biosample/SAMN21385785	ftp://ftp.ncbi.nlm.nih.gov/geo/samples/GSM5573nnn/GSM5573490/suppl/GSM5573490_sample25.csv.gz		GSM5573490
sample26: Primary Gastric Tissue (Tumor)	GSM5573491	Stomach	tissue: Primary Gastric Tissue (Tumor)	polyA RNA	Cellranger v3.0 was used to align FASTQ sequencing reads to the hg38 reference transcriptome, generating single cell feature counts for each sample	BioSample: https://www.ncbi.nlm.nih.gov/biosample/SAMN21385786	ftp://ftp.ncbi.nlm.nih.gov/geo/samples/GSM5573nnn/GSM5573491/suppl/GSM5573491_sample26.csv.gz		GSM5573491
sample27: Primary Gastric Tissue (Tumor)	GSM5573492	Stomach	tissue: Primary Gastric Tissue (Tumor)	polyA RNA	Cellranger v3.0 was used to align FASTQ sequencing reads to the hg38 reference transcriptome, generating single cell feature counts for each sample	BioSample: https://www.ncbi.nlm.nih.gov/biosample/SAMN21385787	ftp://ftp.ncbi.nlm.nih.gov/geo/samples/GSM5573nnn/GSM5573492/suppl/GSM5573492_sample27.csv.gz		GSM5573492
sample28: Primary Gastric Tissue (Tumor)	GSM5573493	Stomach	tissue: Primary Gastric Tissue (Tumor)	polyA RNA	Cellranger v3.0 was used to align FASTQ sequencing reads to the hg38 reference transcriptome, generating single cell feature counts for each sample	BioSample: https://www.ncbi.nlm.nih.gov/biosample/SAMN21385788	ftp://ftp.ncbi.nlm.nih.gov/geo/samples/GSM5573nnn/GSM5573493/suppl/GSM5573493_sample28.csv.gz		GSM5573493
sample29: Primary Gastric Tissue (Tumor)	GSM5573494	Stomach	tissue: Primary Gastric Tissue (Tumor)	polyA RNA	Cellranger v3.0 was used to align FASTQ sequencing reads to the hg38 reference transcriptome, generating single cell feature counts for each sample	BioSample: https://www.ncbi.nlm.nih.gov/biosample/SAMN21385789	ftp://ftp.ncbi.nlm.nih.gov/geo/samples/GSM5573nnn/GSM5573494/suppl/GSM5573494_sample29.csv.gz		GSM5573494
sample30: Primary Gastric Tissue (Tumor)	GSM5573495	Stomach	tissue: Primary Gastric Tissue (Tumor)	polyA RNA	Cellranger v3.0 was used to align FASTQ sequencing reads to the hg38 reference transcriptome, generating single cell feature counts for each sample	BioSample: https://www.ncbi.nlm.nih.gov/biosample/SAMN21385790	ftp://ftp.ncbi.nlm.nih.gov/geo/samples/GSM5573nnn/GSM5573495/suppl/GSM5573495_sample30.csv.gz		GSM5573495
sample31: Primary Gastric Tissue (Normal)	GSM5573496	Stomach	tissue: Primary Gastric Tissue (Normal)	polyA RNA	Cellranger v3.0 was used to align FASTQ sequencing reads to the hg38 reference transcriptome, generating single cell feature counts for each sample	BioSample: https://www.ncbi.nlm.nih.gov/biosample/SAMN21385791	ftp://ftp.ncbi.nlm.nih.gov/geo/samples/GSM5573nnn/GSM5573496/suppl/GSM5573496_sample31.csv.gz		GSM5573496
sample32: Primary Gastric Tissue (Tumor)	GSM5573497	Stomach	tissue: Primary Gastric Tissue (Tumor)	polyA RNA	Cellranger v3.0 was used to align FASTQ sequencing reads to the hg38 reference transcriptome, generating single cell feature counts for each sample	BioSample: https://www.ncbi.nlm.nih.gov/biosample/SAMN21385792	ftp://ftp.ncbi.nlm.nih.gov/geo/samples/GSM5573nnn/GSM5573497/suppl/GSM5573497_sample32.csv.gz		GSM5573497
sample33: Primary Gastric Tissue (Tumor)	GSM5573498	Stomach	tissue: Primary Gastric Tissue (Tumor)	polyA RNA	Cellranger v3.0 was used to align FASTQ sequencing reads to the hg38 reference transcriptome, generating single cell feature counts for each sample	BioSample: https://www.ncbi.nlm.nih.gov/biosample/SAMN21385793	ftp://ftp.ncbi.nlm.nih.gov/geo/samples/GSM5573nnn/GSM5573498/suppl/GSM5573498_sample33.csv.gz		GSM5573498
sample34: Primary Gastric Tissue (Tumor)	GSM5573499	Stomach	tissue: Primary Gastric Tissue (Tumor)	polyA RNA	Cellranger v3.0 was used to align FASTQ sequencing reads to the hg38 reference transcriptome, generating single cell feature counts for each sample	BioSample: https://www.ncbi.nlm.nih.gov/biosample/SAMN21385794	ftp://ftp.ncbi.nlm.nih.gov/geo/samples/GSM5573nnn/GSM5573499/suppl/GSM5573499_sample34.csv.gz		GSM5573499
sample35: Primary Gastric Tissue (Normal)	GSM5573500	Stomach	tissue: Primary Gastric Tissue (Normal)	polyA RNA	Cellranger v3.0 was used to align FASTQ sequencing reads to the hg38 reference transcriptome, generating single cell feature counts for each sample	BioSample: https://www.ncbi.nlm.nih.gov/biosample/SAMN21385795	ftp://ftp.ncbi.nlm.nih.gov/geo/samples/GSM5573nnn/GSM5573500/suppl/GSM5573500_sample35.csv.gz		GSM5573500
sample36: Primary Gastric Tissue (Tumor)	GSM5573501	Stomach	tissue: Primary Gastric Tissue (Tumor)	polyA RNA	Cellranger v3.0 was used to align FASTQ sequencing reads to the hg38 reference transcriptome, generating single cell feature counts for each sample	BioSample: https://www.ncbi.nlm.nih.gov/biosample/SAMN21385798	ftp://ftp.ncbi.nlm.nih.gov/geo/samples/GSM5573nnn/GSM5573501/suppl/GSM5573501_sample36.csv.gz		GSM5573501
sample37: Peritonium tissue (Normal)	GSM5573502	peritoneum	tissue: Peritonium tissue (Normal)	polyA RNA	Cellranger v3.0 was used to align FASTQ sequencing reads to the hg38 reference transcriptome, generating single cell feature counts for each sample	BioSample: https://www.ncbi.nlm.nih.gov/biosample/SAMN21385747	ftp://ftp.ncbi.nlm.nih.gov/geo/samples/GSM5573nnn/GSM5573502/suppl/GSM5573502_sample37.csv.gz		GSM5573502
sample38: Peritonium tissue (Tumor)	GSM5573503	peritoneum	tissue: Peritonium tissue (Tumor)	polyA RNA	Cellranger v3.0 was used to align FASTQ sequencing reads to the hg38 reference transcriptome, generating single cell feature counts for each sample	BioSample: https://www.ncbi.nlm.nih.gov/biosample/SAMN21385749	ftp://ftp.ncbi.nlm.nih.gov/geo/samples/GSM5573nnn/GSM5573503/suppl/GSM5573503_sample38.csv.gz		GSM5573503
sample39: Primary Gastric Tissue (Tumor)	GSM5573504	Stomach	tissue: Primary Gastric Tissue (Tumor)	polyA RNA	Cellranger v3.0 was used to align FASTQ sequencing reads to the hg38 reference transcriptome, generating single cell feature counts for each sample	BioSample: https://www.ncbi.nlm.nih.gov/biosample/SAMN21385796	ftp://ftp.ncbi.nlm.nih.gov/geo/samples/GSM5573nnn/GSM5573504/suppl/GSM5573504_sample39.csv.gz		GSM5573504
sample40: Primary Gastric Tissue (Tumor)	GSM5573505	Stomach	tissue: Primary Gastric Tissue (Tumor)	polyA RNA	Cellranger v3.0 was used to align FASTQ sequencing reads to the hg38 reference transcriptome, generating single cell feature counts for each sample	BioSample: https://www.ncbi.nlm.nih.gov/biosample/SAMN21385797	ftp://ftp.ncbi.nlm.nih.gov/geo/samples/GSM5573nnn/GSM5573505/suppl/GSM5573505_sample40.csv.gz		GSM5573505

## Sheet: 文章增补临床信息
	Patient ID	Sample		Age	Gender	Location	Stage*	Laurens	IM Status	MMR	EBV	TCGA	Primary Tumor	Primary Normal	Peritoneal Tumor	Peritoneal Normal	Organoid Tumor	Organoid Normal
6	NGCII518	sample1	1	74	M	Antrum	II	Mixed intestinal and diffuse	IM only	Loss MLH1/PMS2	Negative	MSI	Y	Y
6	NGCII518	sample2	2	74	M	Antrum	II	Mixed intestinal and diffuse	IM only	Loss MLH1/PMS2	Negative	MSI	Y	Y
22	NGCII519	sample3	3	83	M	N.A	III	Diffuse	IM with chronic gastritis	Intact	Negative	CIN	Y
4	NGCII520	sample4	4	83	M	Distal	III	Diffuse	IM with chronic gastritis	Intact	Negative	GS	Y	Y
4	NGCII520	sample5	5	83	M	Distal	III	Diffuse	IM with chronic gastritis	Intact	Negative	GS	Y	Y
1	NGCII521	sample6	6	62	M	Antrum	II	Intestinal	IM only	Intact	Negative	GS	Y	Y
1	NGCII521	sample7	7	62	M	Antrum	II	Intestinal	IM only	Intact	Negative	GS	Y	Y
26	NGCII524	sample8	8	71	M	N.A	IV	N.A	N.A	Intact	Negative	CIN	Y
7	NGCII525	sample9	9	73	M	Antrum	II	Mixed intestinal and diffuse	IM with chronic gastritis	Intact	Negative	CIN	Y	Y
7	NGCII525	sample10	10	73	M	Antrum	II	Mixed intestinal and diffuse	IM with chronic gastritis	Intact	Negative	CIN	Y	Y
8	NGCII527	sample11	11	69	M	N.A	IV	Metastatic	N.A	Intact	Negative	CIN	Y	Y
8	NGCII527	sample12	12	69	M	N.A	IV	Metastatic	N.A	Intact	Negative	CIN	Y	Y
11	NGCII529	sample13	13	84	F	Antrum	I	Intestinal	IM with chronic gastritis	Loss of MLH1/PMS2	Negative	MSI	Y
16	NGCII502	sample14	14	36	M	Cardia	III	Intestinal	No IM, Chronic gastritis & HGD	Intact	Negative	CIN	Y				Y	Y
12	NGCII511	sample15	15	68	M	Antrum	II	Intestinal	N.A	Loss of MLH1/PMS2	Negative	MSI	Y
15	NGCII499	sample16	16	88	M	Pylorus	III	Intestinal	IM with chronic gastritis & LGD	loss of MLH1/PMS2	Negative	MSI	Y
17	NGCII509	sample17	17	65	M	Cardia	III	Intestinal	Chronic gastritis only	Intact	Negative	CIN	Y
13	NGCII498	sample18	18	68	F	Antrum	II	Intestinal	IM with chronic gastritis	Intact	Negative	GS	Y				Y	Y
28	NGCII011	sample19	19	67	F	N.A	DM	N.A	N.A	N.A	N.A	N.A			Y
29	NGCII015	sample20	20	51	M	Peritoneum	DM	N.A	N.A	Intact	Negative	N.A			Y
2	NGCII513	sample21	21	74	M	Antrum	III	Intestinal	Moderately extensive IM	Loss of PMS2	Negative	MSI	Y	Y
2	NGCII513	sample22	22	74	M	Antrum	III	Intestinal	Moderately extensive IM	Loss of PMS2	Negative	MSI	Y	Y
5	NGCII514	sample23	23	67	F	Body-Antrum	III	Diffuse	N.A	Intact	Negative	GS	Y	Y
5	NGCII514	sample24	24	67	F	Body-Antrum	III	Diffuse	N.A	Intact	Negative	GS	Y	Y
3	NGCII512	sample25	25	86	F	Antrum	III	Intestinal	IM with HGD	Intact	Negative	CIN	Y	Y
3	NGCII512	sample26	26	86	F	Antrum	III	Intestinal	IM with HGD	Intact	Negative	CIN	Y	Y
21	NGCII510	sample27	27	66	F	Antrum	I	Diffuse	Chronic gastritis only	Loss of PMS2	Negative	MSI	Y
23	NGCII531	sample28	28	70	F	Proximal	III	Diffuse	N.A	Intact	Negative	GS	Y
14	NGCII522	sample29	29	64	M	Body-Antrum	II	Intestinal	Chronic gastritis with IM	Intact	Negative	GS	Y
25	NGCII533	sample30	30	55	M	Antrum	III	Mixed intestinal and diffuse	Chronic gastritis only	Intact	Negative	CIN	Y
27	NGCII536	sample31	31	63	M	Antrum	Normal	N.A	N.A	N.A	N.A	N.A		Y
10	NGCII539	sample32	32	65	F	Antrum	I	Intestinal	IM with chronic gastritis & LGD	Intact	Negative	GS	Y
18	NGCII540	sample33	33	80	M	Antrum	III	Intestinal	IM with chronic gastritis	Loss of MLH1/PMS2	Negative	MSI	Y
19	NGCII541	sample34	34	82	M	Antrum	III	Intestinal	N.A	Intact	Negative	CIN	Y
9	NGCII538	sample35	35	56	F	Antrum	IV	Metastatic	N.A	N.A.	N.A	GS	Y	Y	Y	Y
9	NGCII538	sample36	36	56	F	Antrum	IV	Metastatic	N.A	N.A.	N.A	GS	Y	Y	Y	Y
9	NGCII538	sample37	37	56	F	Antrum	IV	Metastatic	N.A	N.A.	N.A	GS	Y	Y	Y	Y
9	NGCII538	sample38	38	56	F	Antrum	IV	Metastatic	N.A	N.A.	N.A	GS	Y	Y	Y	Y
20	NGCII543	sample39	39	73	F	Antrum	III	Intestinal	IM with chronic gastritis	Intact	Negative	CIN	Y
24	NGCII545	sample40	40	60	M	Antrum	III	Diffuse	N.A	Intact	Negative	GS	Y

## Sheet: 实际使用
3	sample3: Primary Gastric Tissue (Tumor)	NGCII519	519	P11_Diffuse_Stomach	11	Diffuse	GSM5573468	Stomach	83	M	N.A	III	IM with chronic gastritis	Intact	Negative	CIN	Y
5	sample5: Primary Gastric Tissue (Tumor)	NGCII520	520	P12_Diffuse_Stomach	12	Diffuse	GSM5573470	Stomach	83	M	Distal	III	IM with chronic gastritis	Intact	Negative	GS	Y	Y
7	sample7: Primary Gastric Tissue (Tumor)	NGCII521	521	P13_Intestinal_Stomach	13	Intestinal	GSM5573472	Stomach	62	M	Antrum	II	IM only	Intact	Negative	GS	Y	Y
13	sample13: Primary Gastric Tissue (Tumor)	NGCII529	529	P17_Intestinal_Stomach	17	Intestinal	GSM5573478	Stomach	84	F	Antrum	I	IM with chronic gastritis	Loss of MLH1/PMS2	Negative	MSI	Y
14	sample14: Primary Gastric Tissue (Tumor)	NGCII502	502	P3_Intestinal_Stomach	3	Intestinal	GSM5573479	Stomach	36	M	Cardia	III	No IM, Chronic gastritis & HGD	Intact	Negative	CIN	Y				Y	Y
15	sample15: Primary Gastric Tissue (Tumor)	NGCII511	511	P6_Intestinal_Stomach	6	Intestinal	GSM5573480	Stomach	68	M	Antrum	II	N.A	Loss of MLH1/PMS2	Negative	MSI	Y
16	sample16: Primary Gastric Tissue (Tumor)	NGCII499	499	P2_Intestinal_Stomach	2	Intestinal	GSM5573481	Stomach	88	M	Pylorus	III	IM with chronic gastritis & LGD	loss of MLH1/PMS2	Negative	MSI	Y
17	sample17: Primary Gastric Tissue (Tumor)	NGCII509	509	P4_Intestinal_Stomach	4	Intestinal	GSM5573482	Stomach	65	M	Cardia	III	Chronic gastritis only	Intact	Negative	CIN	Y
18	sample18: Primary Gastric Tissue (Tumor)	NGCII498	498	P1_Intestinal_Stomach	1	Intestinal	GSM5573483	Stomach	68	F	Antrum	II	IM with chronic gastritis	Intact	Negative	GS	Y				Y	Y
22	sample22: Primary Gastric Tissue (Tumor)	NGCII513	513	P8_Intestinal_Stomach	8	Intestinal	GSM5573487	Stomach	74	M	Antrum	III	Moderately extensive IM	Loss of PMS2	Negative	MSI	Y	Y
24	sample24: Primary Gastric Tissue (Tumor)	NGCII514	514	P9_Diffuse_Stomach	9	Diffuse	GSM5573489	Stomach	67	F	Body-Antrum	III	N.A	Intact	Negative	GS	Y	Y
26	sample26: Primary Gastric Tissue (Tumor)	NGCII512	512	P7_Intestinal_Stomach	7	Intestinal	GSM5573491	Stomach	86	F	Antrum	III	IM with HGD	Intact	Negative	CIN	Y	Y
27	sample27: Primary Gastric Tissue (Tumor)	NGCII510	510	P5_Diffuse_Stomach	5	Diffuse	GSM5573492	Stomach	66	F	Antrum	I	Chronic gastritis only	Loss of PMS2	Negative	MSI	Y
28	sample28: Primary Gastric Tissue (Tumor)	NGCII531	531	P18_Diffuse_Stomach	18	Diffuse	GSM5573493	Stomach	70	F	Proximal	III	N.A	Intact	Negative	GS	Y
29	sample29: Primary Gastric Tissue (Tumor)	NGCII522	522	P14_Intestinal_Stomach	14	Intestinal	GSM5573494	Stomach	64	M	Body-Antrum	II	Chronic gastritis with IM	Intact	Negative	GS	Y
32	sample32: Primary Gastric Tissue (Tumor)	NGCII539	539	P21_Intestinal_Stomach	21	Intestinal	GSM5573497	Stomach	65	F	Antrum	I	IM with chronic gastritis & LGD	Intact	Negative	GS	Y
33	sample33: Primary Gastric Tissue (Tumor)	NGCII540	540	P22_Intestinal_Stomach	22	Intestinal	GSM5573498	Stomach	80	M	Antrum	III	IM with chronic gastritis	Loss of MLH1/PMS2	Negative	MSI	Y
34	sample34: Primary Gastric Tissue (Tumor)	NGCII541	541	P23_Intestinal_Stomach	23	Intestinal	GSM5573499	Stomach	82	M	Antrum	III	N.A	Intact	Negative	CIN	Y
39	sample39: Primary Gastric Tissue (Tumor)	NGCII543	543	P24_Intestinal_Stomach	24	Intestinal	GSM5573504	Stomach	73	F	Antrum	III	IM with chronic gastritis	Intact	Negative	CIN	Y
40	sample40: Primary Gastric Tissue (Tumor)	NGCII545	545	P25_Diffuse_Stomach	25	Diffuse	GSM5573505	Stomach	60	M	Antrum	III	N.A	Intact	Negative	GS	Y
ID	!Sample_title	Patient ID		10X ID		Laurens		!Sample_source_name_ch1	Age	Gender	Location	Stage*	IM Status	MMR	EBV	TCGA	Primary Tumor	Primary Normal	Peritoneal Tumor	Peritoneal Normal	Organoid Tumor	Organoid Normal
